# Supplementary material
Source: MDPI journal article supplement (https://www.mdpi.com/search?q=molecules-25-00450)
Supplement: s001 [file molecules-25-00450-s001.pdf]

# Synthesis of a New Series of Nitrogen/Sulfur Heterocycles by Linking Four Rings: Indole; 1,2,4-Triazole; Pyridazine; and Quinoxaline

Ahmed T. A. Boraie<sup>1,\*</sup>, Ahmed A. Sarhan<sup>2</sup>, Sammer Yousuf<sup>3</sup>, and Assem Barakat<sup>4,5,\*</sup>

<sup>1</sup> Chemistry Department, Faculty of Science, Suez Canal University, Ismailia 41522, Egypt.

<sup>2</sup> Chemistry Department, Faculty of Science, Al-Arish University, Al-Arish 45511, Egypt.  
ahmed\_sarhan252@yahoo.com

<sup>3</sup> H.E.J. Research Institute of Chemistry, International Center for Chemical and Biological Sciences, University of Karachi, Karachi 75270, Pakistan. dr.sammer.yousuf@gmail.com

<sup>4</sup> Chemistry Department, College of Science, King Saud University, P.O. Box 2455, Riyadh, 11451, Saudi Arabia

<sup>5</sup> Chemistry Department, Faculty of Science, Alexandria University, P.O. Box 426, Ibrahimia, Alexandria 21321, Egypt

\* Correspondence: ahmed\_tawfeek83@yahoo.com (A.T.A.B); ambarakat@ksu.edu.sa (A.B.);  
Tel.: +966-11467-5901 (A.B.); Fax: +966-11467-5992 (A.B.).

# NMR Spectra

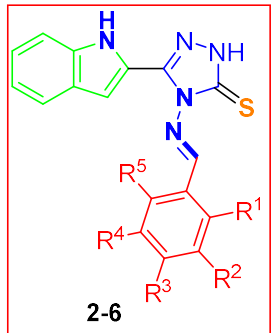

- 2  $R^1 = R^2 = R^3 = R^4 = R^5 = H$
- 3  $R^1 = R^2 = H, R^3 = F, R^4 = R^5 = H$
- 4  $R^1 = R^3 = R^4 = R^5 = H, R^2 = Br$
- 5  $R^1 = R^2 = H, R^3 = CH_3, R^4 = R^5 = H$
- 6  $R^1 = OH, R^2 = OCH_3, R^3 = R^4 = R^5 = H$

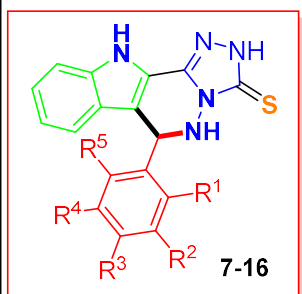

- 7  $R^1 = R^2 = R^3 = R^4 = R^5 = H$
- 8  $R^1 = R^2 = H, R^3 = F, R^4 = R^5 = H$
- 9  $R^1 = R^3 = R^4 = R^5 = H, R^2 = Br$
- 10  $R^1 = R^2 = H, R^3 = CH_3, R^4 = R^5 = H$
- 11  $R^1 = R^2 = R^3 = OCH_3, R^4 = R^5 = H$
- 12  $R^1 = R^2 = H, R^3 = Cl, R^4 = R^5 = H$
- 13  $R^1 = R^2 = H, R^3 = Br, R^4 = R^5 = H$
- 14  $R^1 = R^4 = R^5 = H, R^2 = R^3 = OH,$
- 15  $R^1 = R^4 = R^5 = H, R^2 = OCH_3, R^3 = OH$
- 16  $R^1 = OH, R^2 = OCH_3, R^3 = R^4 = R^5 = H$

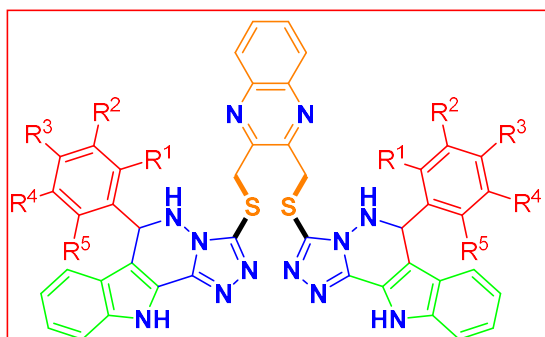

- 19  $R^1 = R^2 = R^3 = R^4 = R^5 = H$
- 20  $R^1 = R^2 = H, R^3 = F, R^4 = R^5 = H$
- 21  $R^1 = R^3 = R^4 = R^5 = H, R^2 = Br$
- 22  $R^1 = R^2 = R^4 = R^5 = H, R^3 = CH_3,$
- 23  $R^1 = R^2 = R^3 = OCH_3, R^4 = R^5 = H$
- 24  $R^1 = R^2 = H, R^3 = Cl, R^4 = R^5 = H$
- 25  $R^1 = R^2 = R^4 = R^5 = H, R^3 = Br$

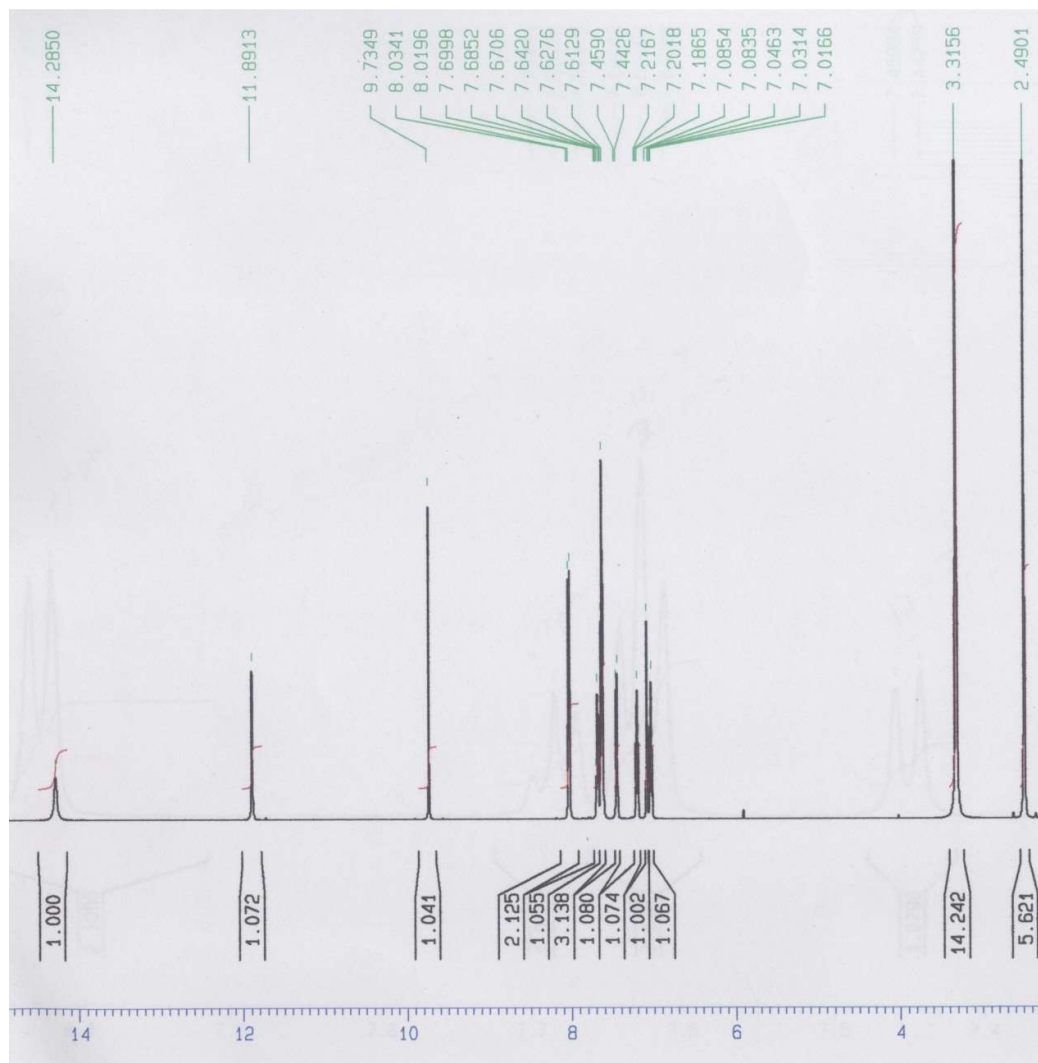

Figure S1. <sup>1</sup>H NMR of 2

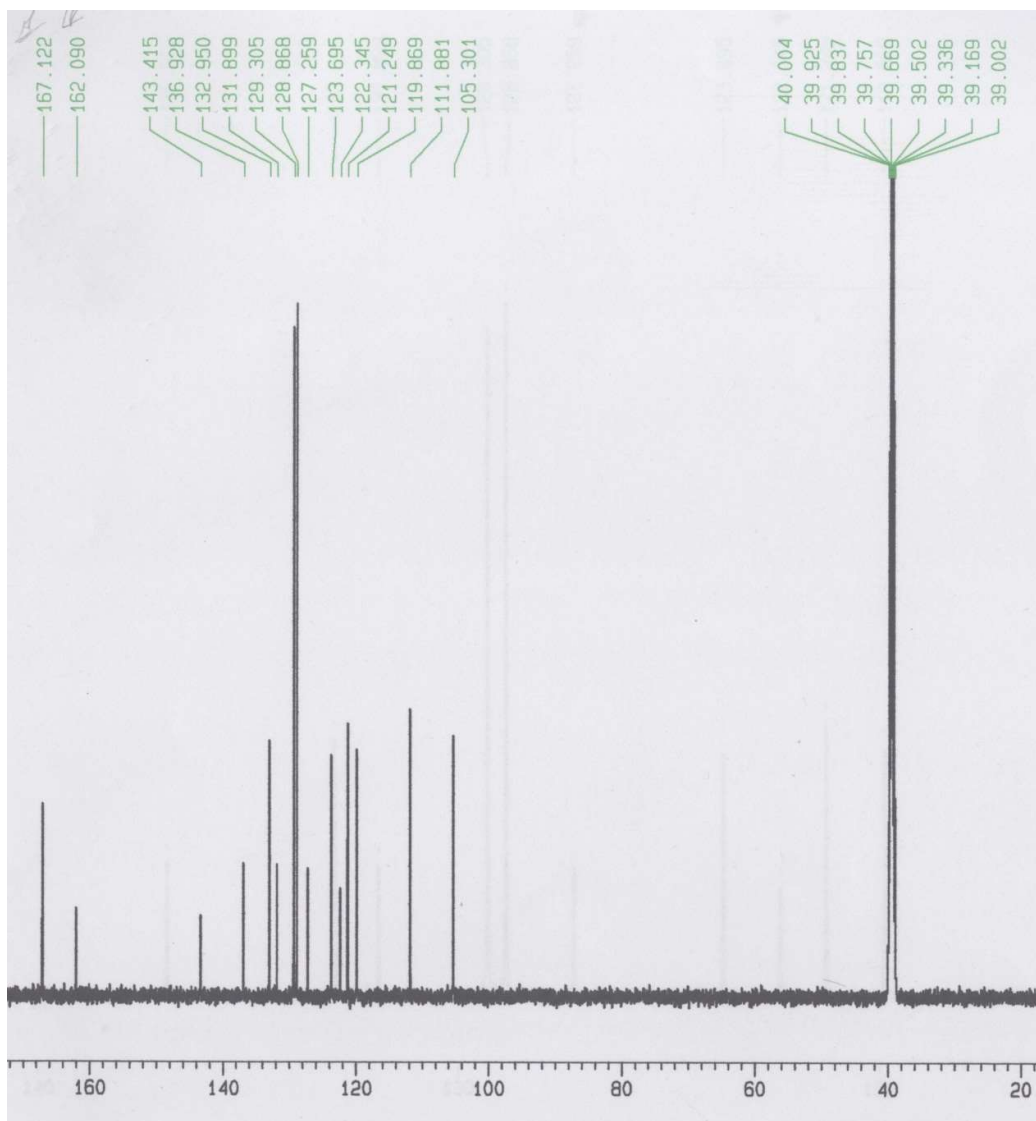

**Figure S2.**  $^{13}\text{C}$  NMR of **2**

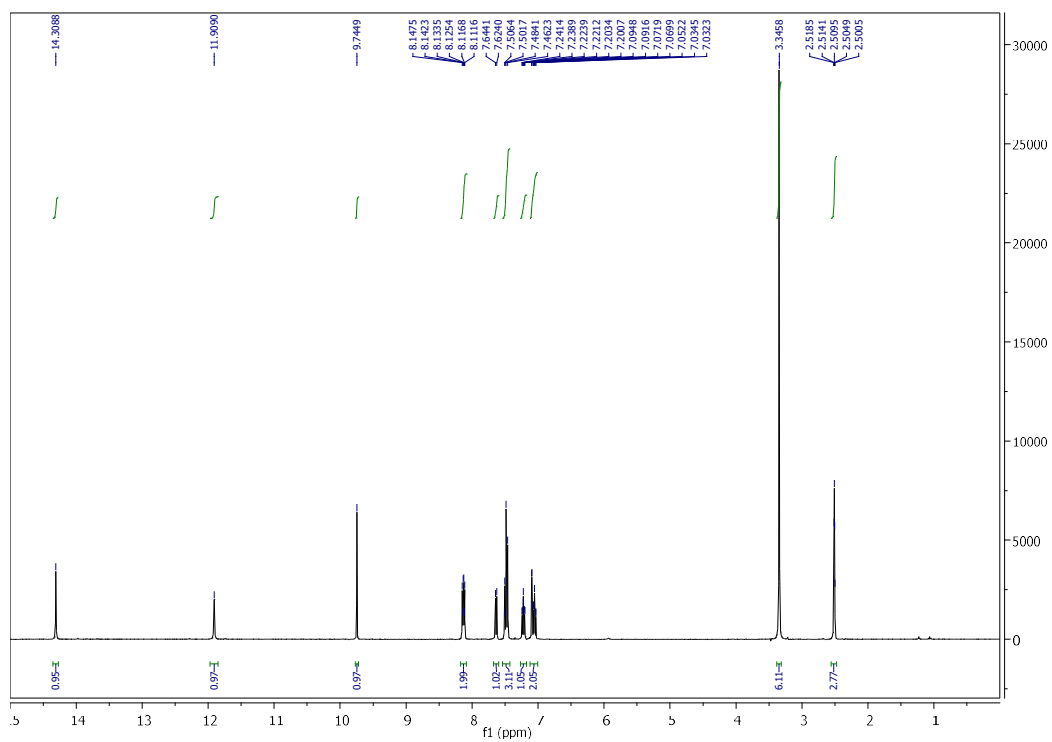

Figure S3.  $^1\text{H}$  NMR of 3

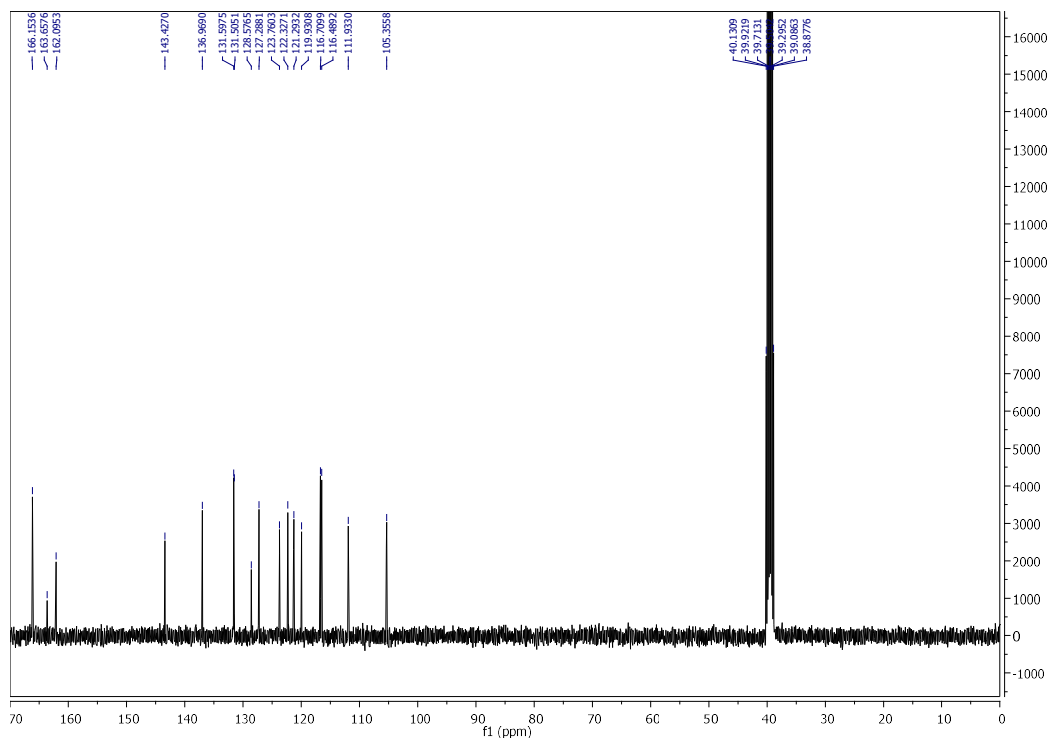

Figure S4.  $^{13}\text{C}$  NMR of 3

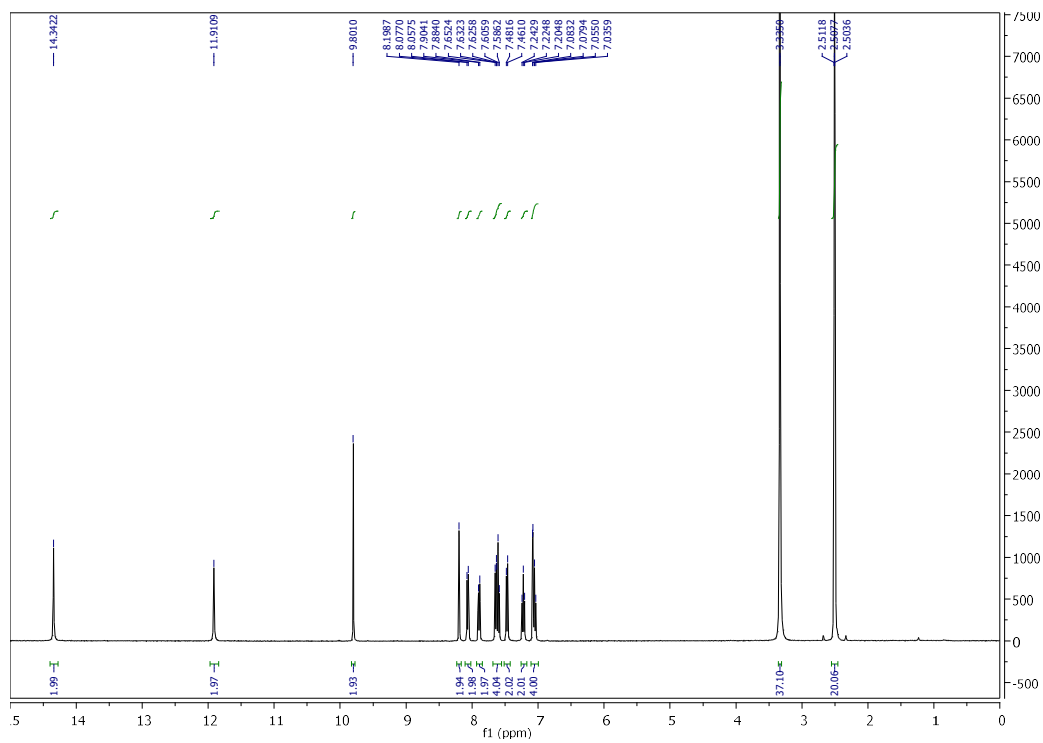

Figure S5.  $^1\text{H}$  NMR of 4

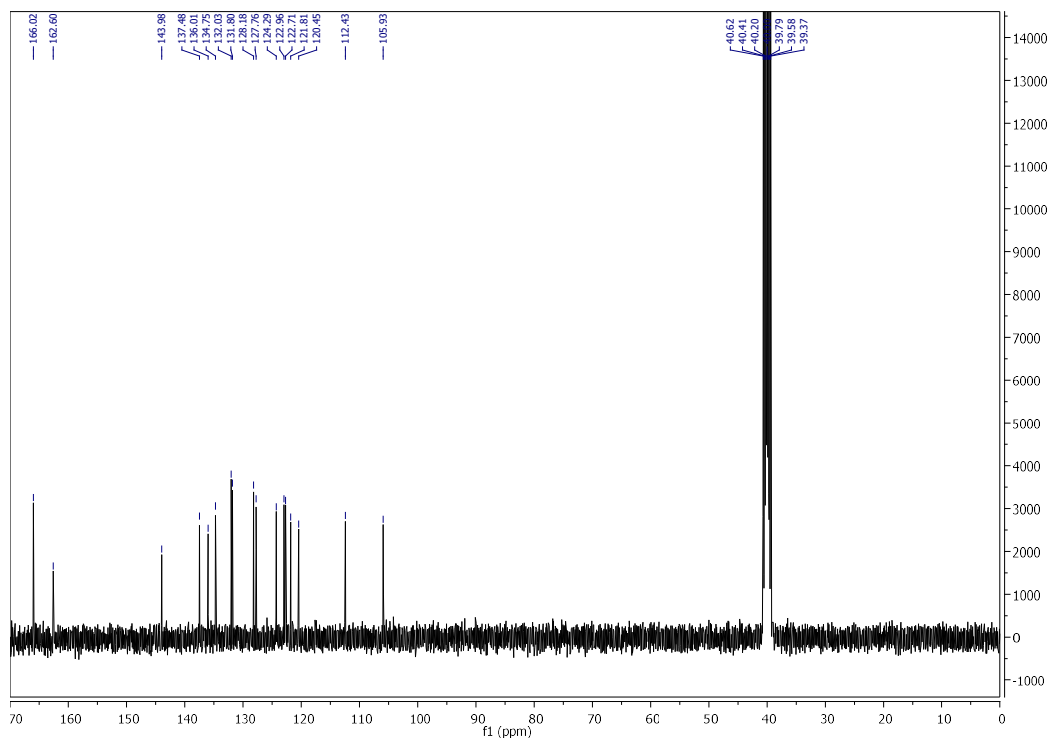

Figure S6.  $^{13}\text{C}$  NMR of 4

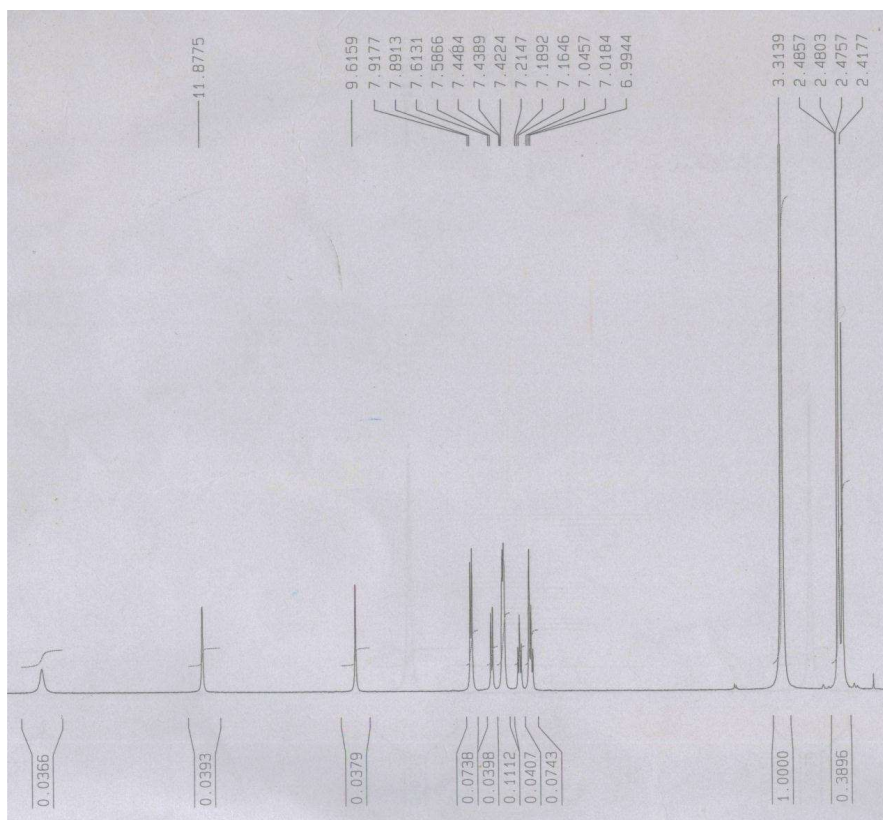

Figure S7.  $^1\text{H}$  NMR of 5

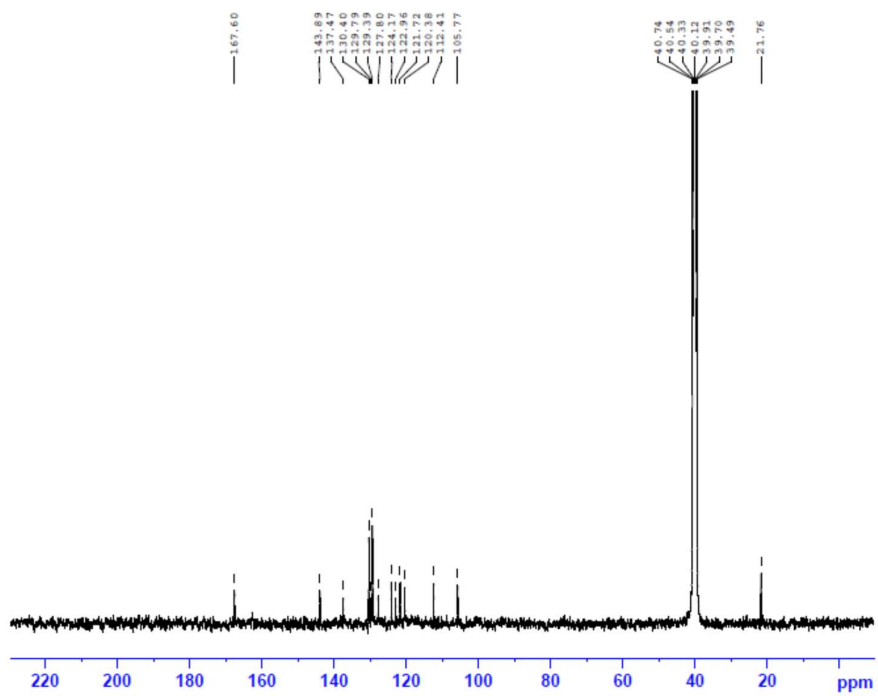

Figure S8.  $^{13}\text{C}$  NMR of 5



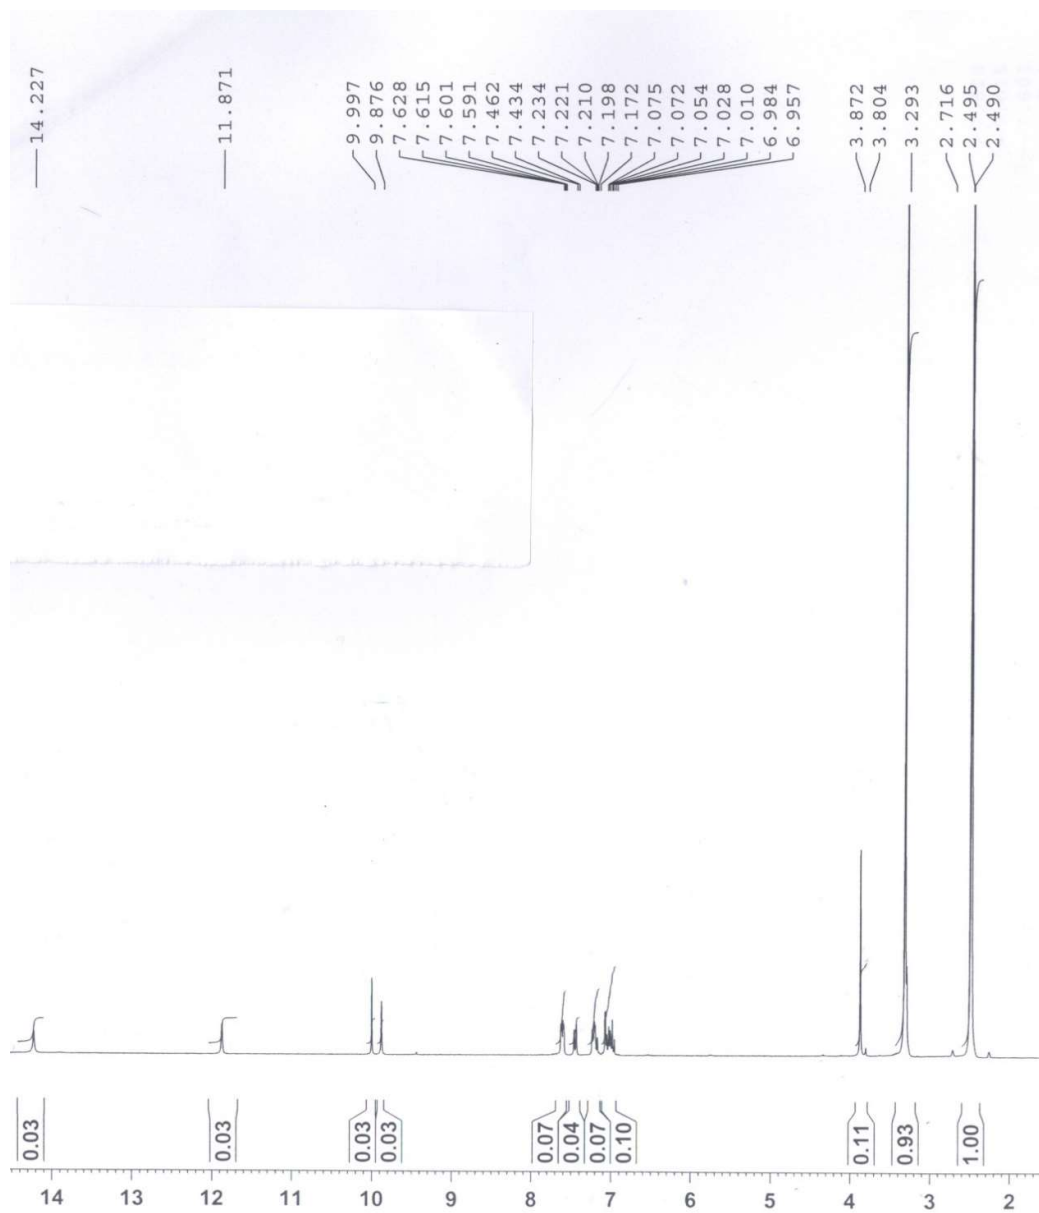

Figure S9.  $^1\text{H}$  NMR of **6**

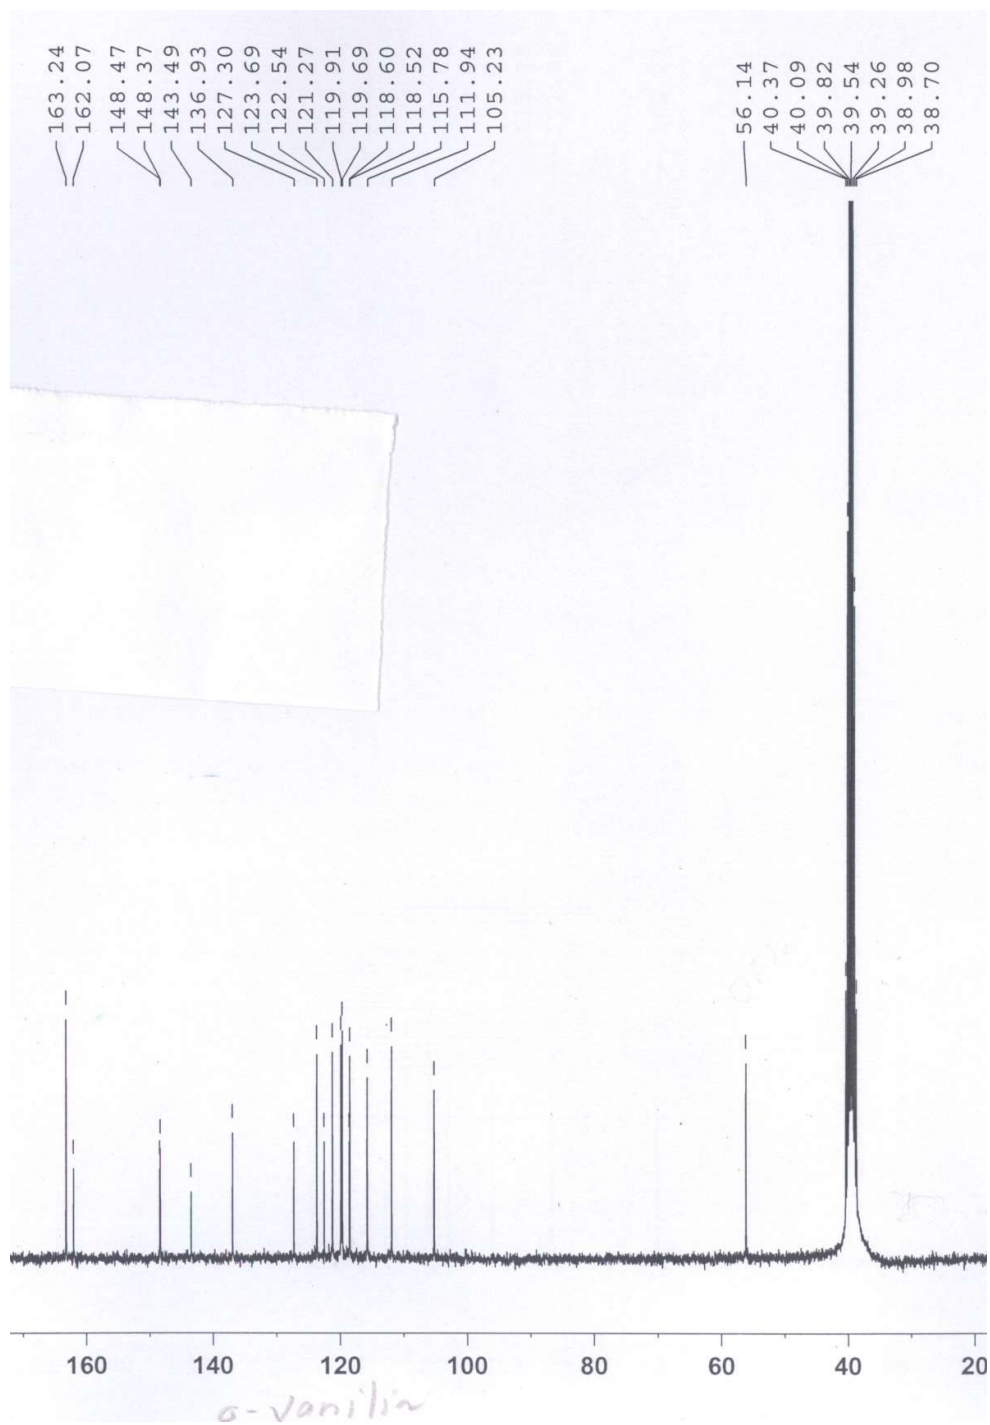

Figure S10.  $^{13}\text{C}$  NMR of 6

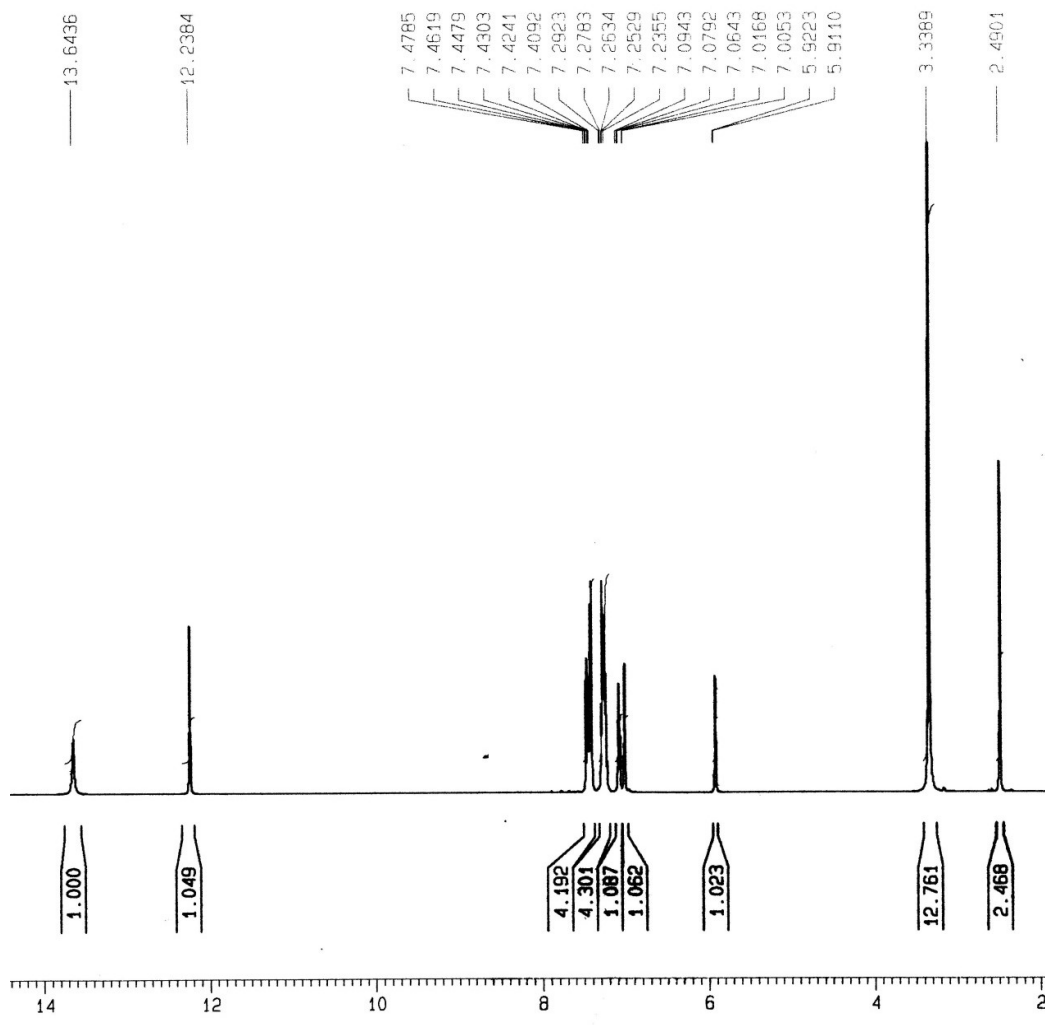

Figure S11. <sup>1</sup>H NMR of 7

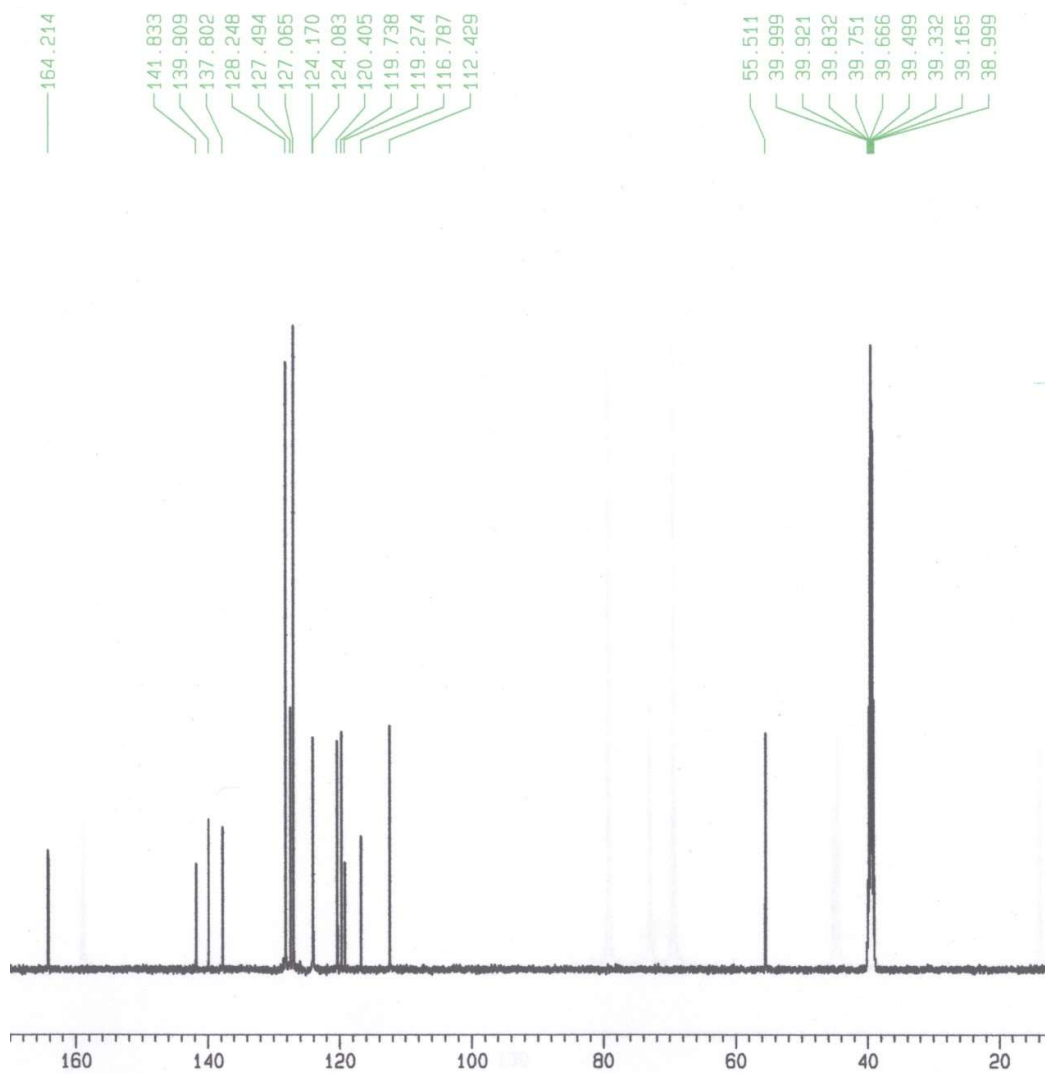

Figure S12.  $^{13}\text{C}$  NMR of 7

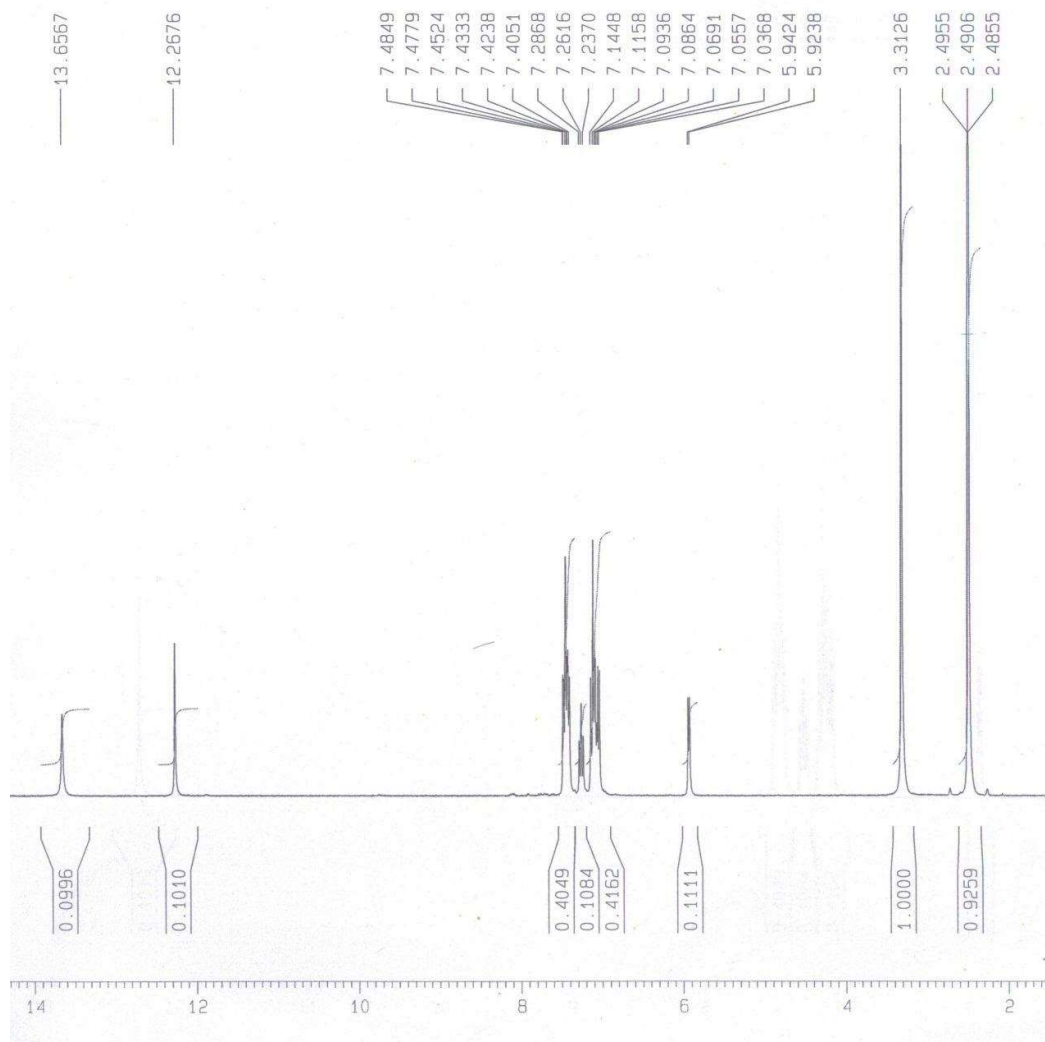

Figure S13.  $^1\text{H}$  NMR of **8**

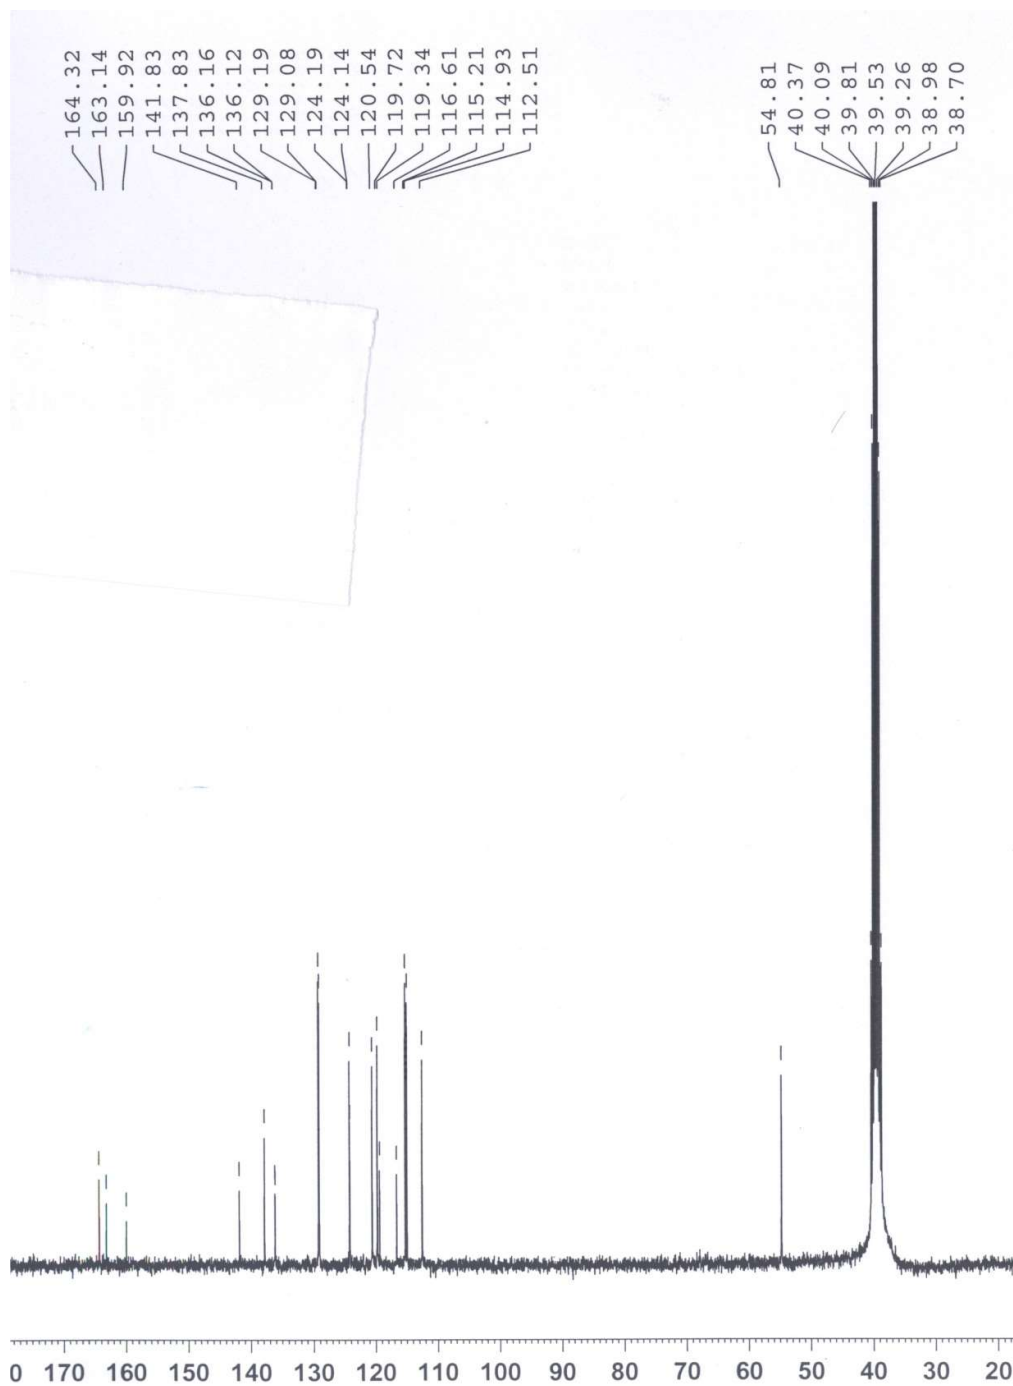

Figure S14.  $^{13}\text{C}$  NMR of **8**

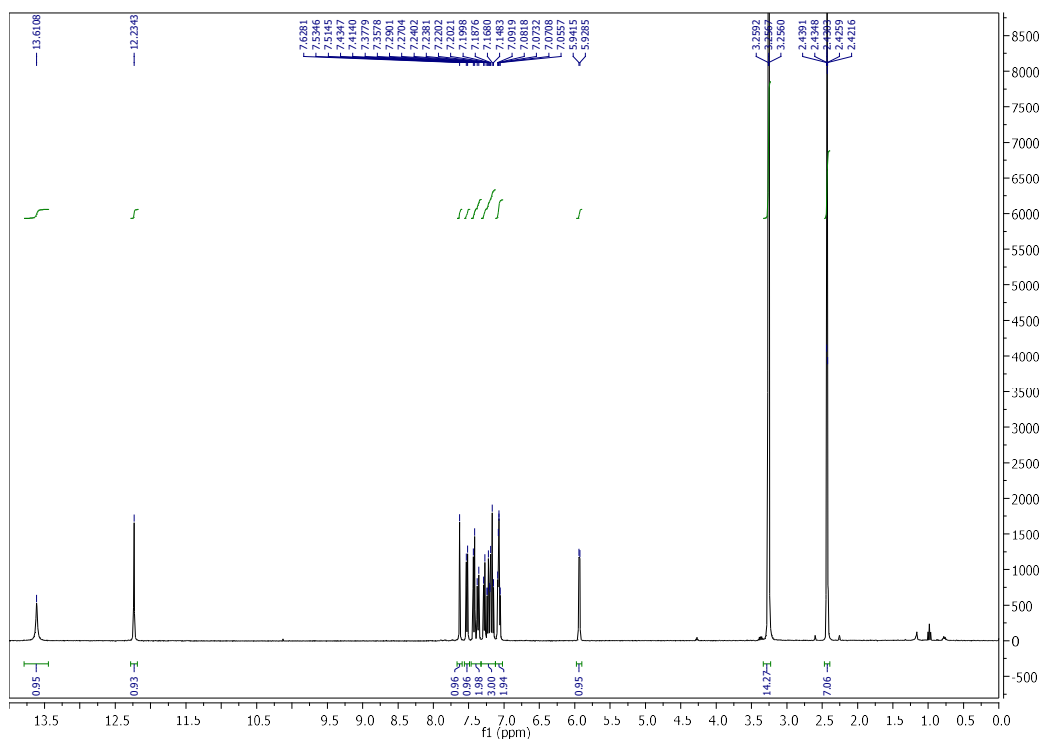

Figure S15.  $^1\text{H}$  NMR of 9

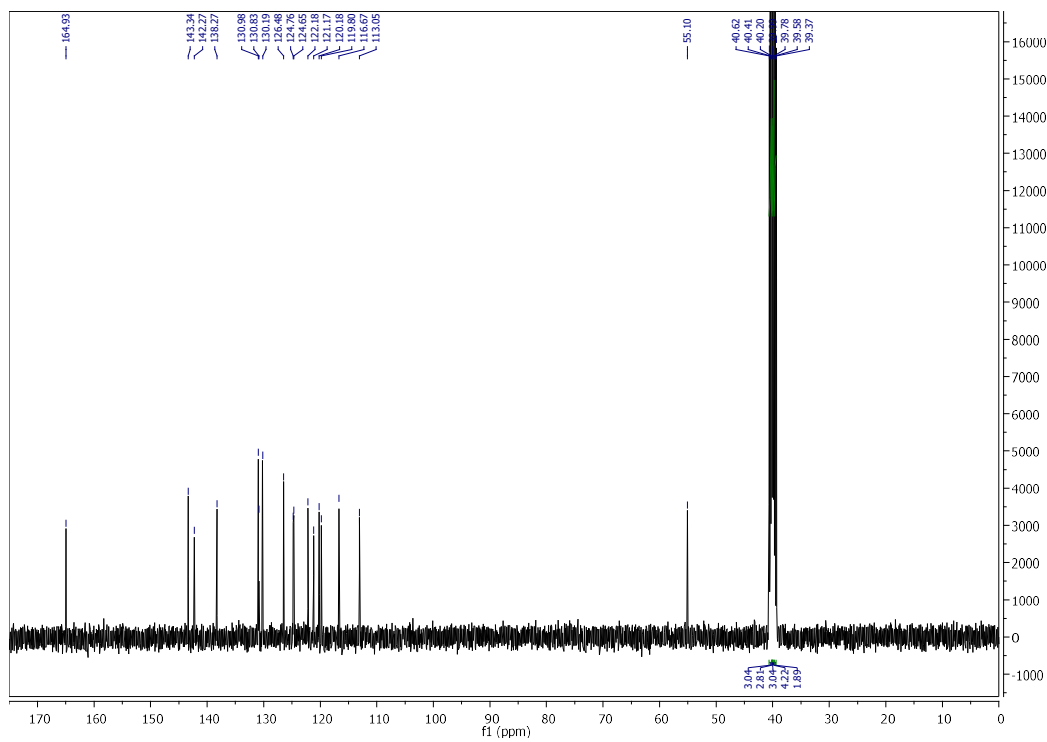

Figure S16.  $^{13}\text{C}$  NMR of 9

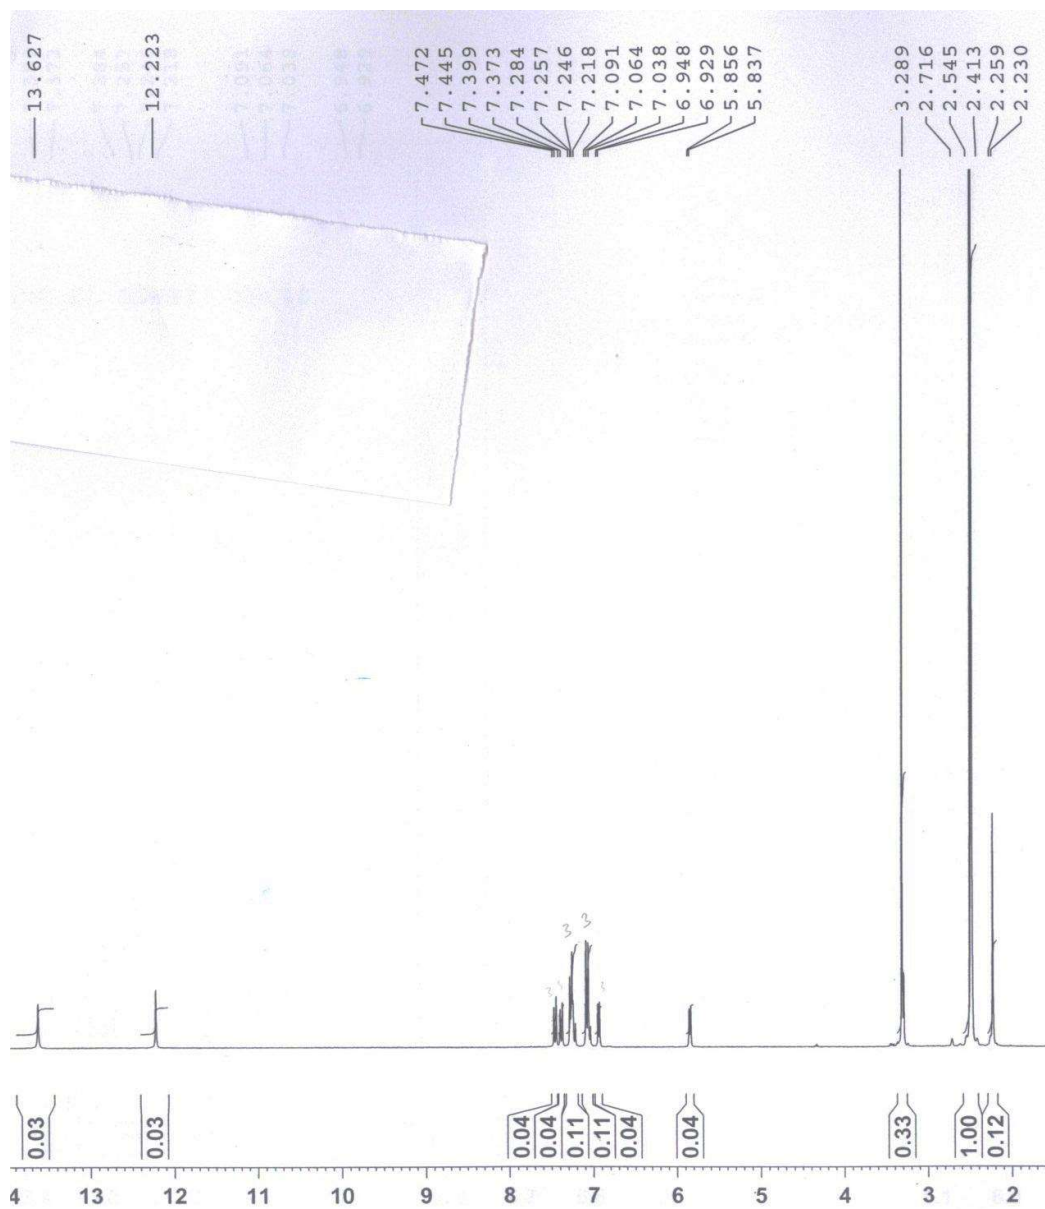

Figure S17.  $^1\text{H}$  NMR of 10



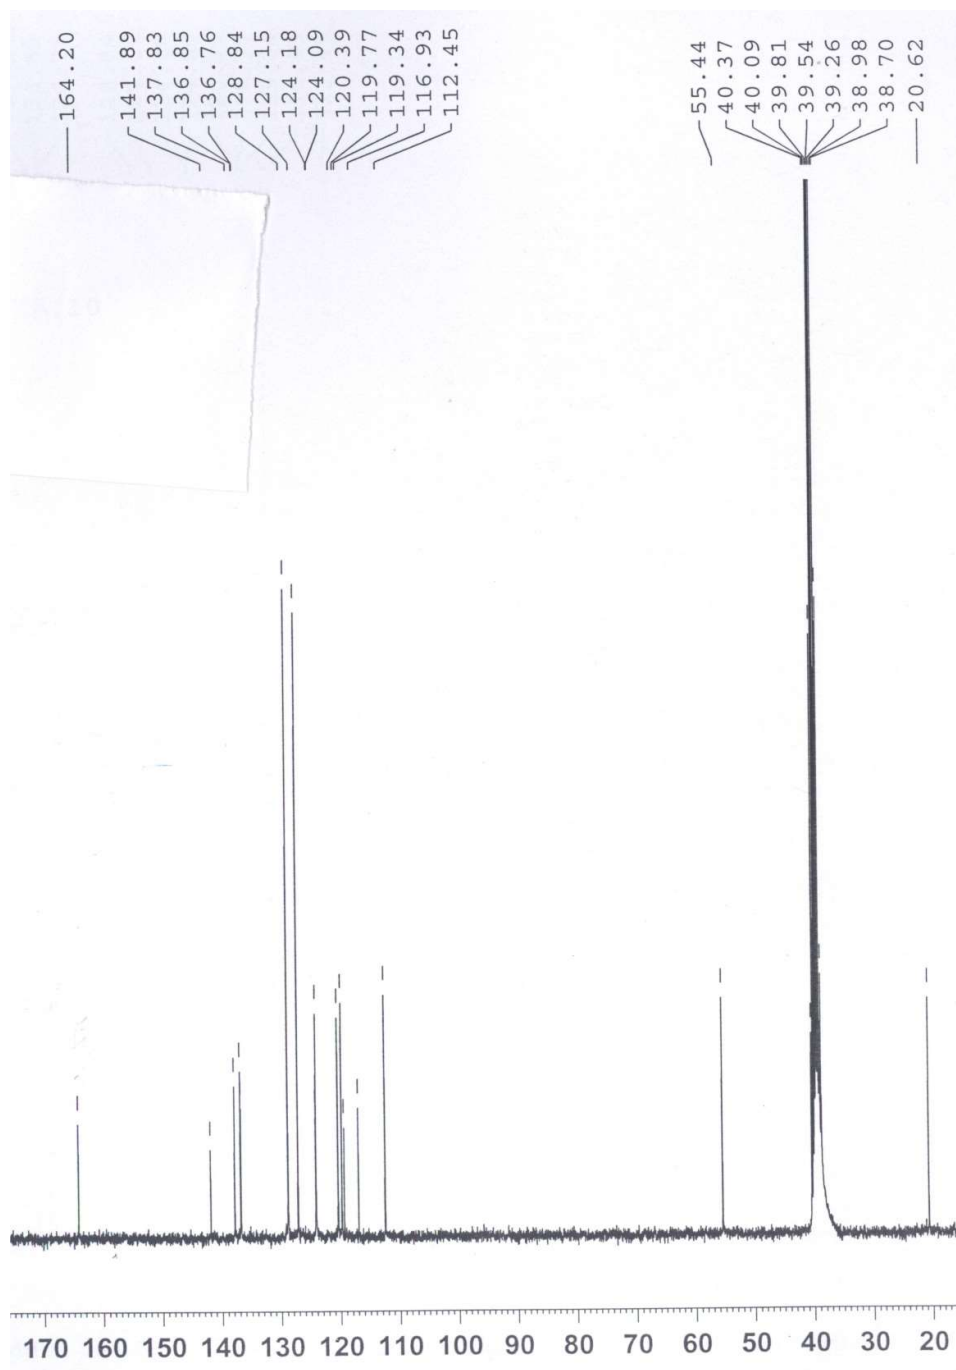

Figure S18.  $^{13}\text{C}$  NMR of 10

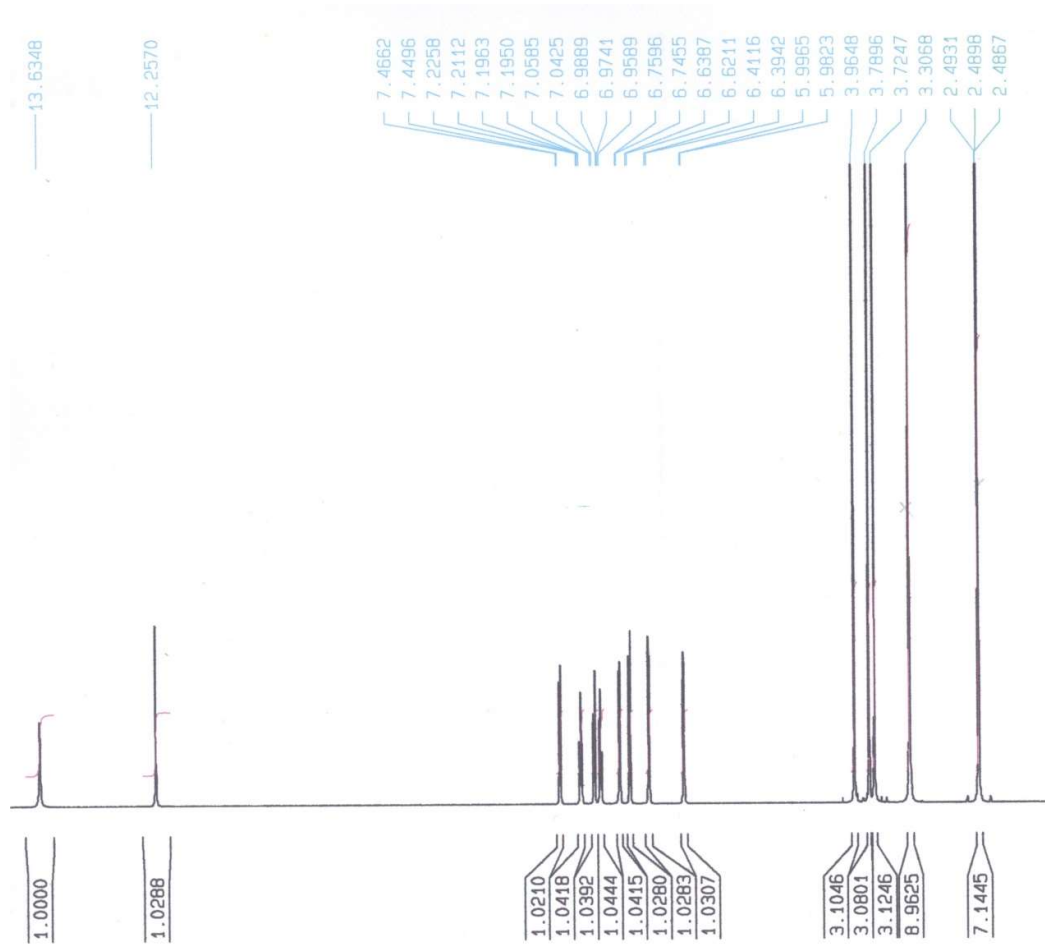

Figure S19. <sup>1</sup>H NMR of 11

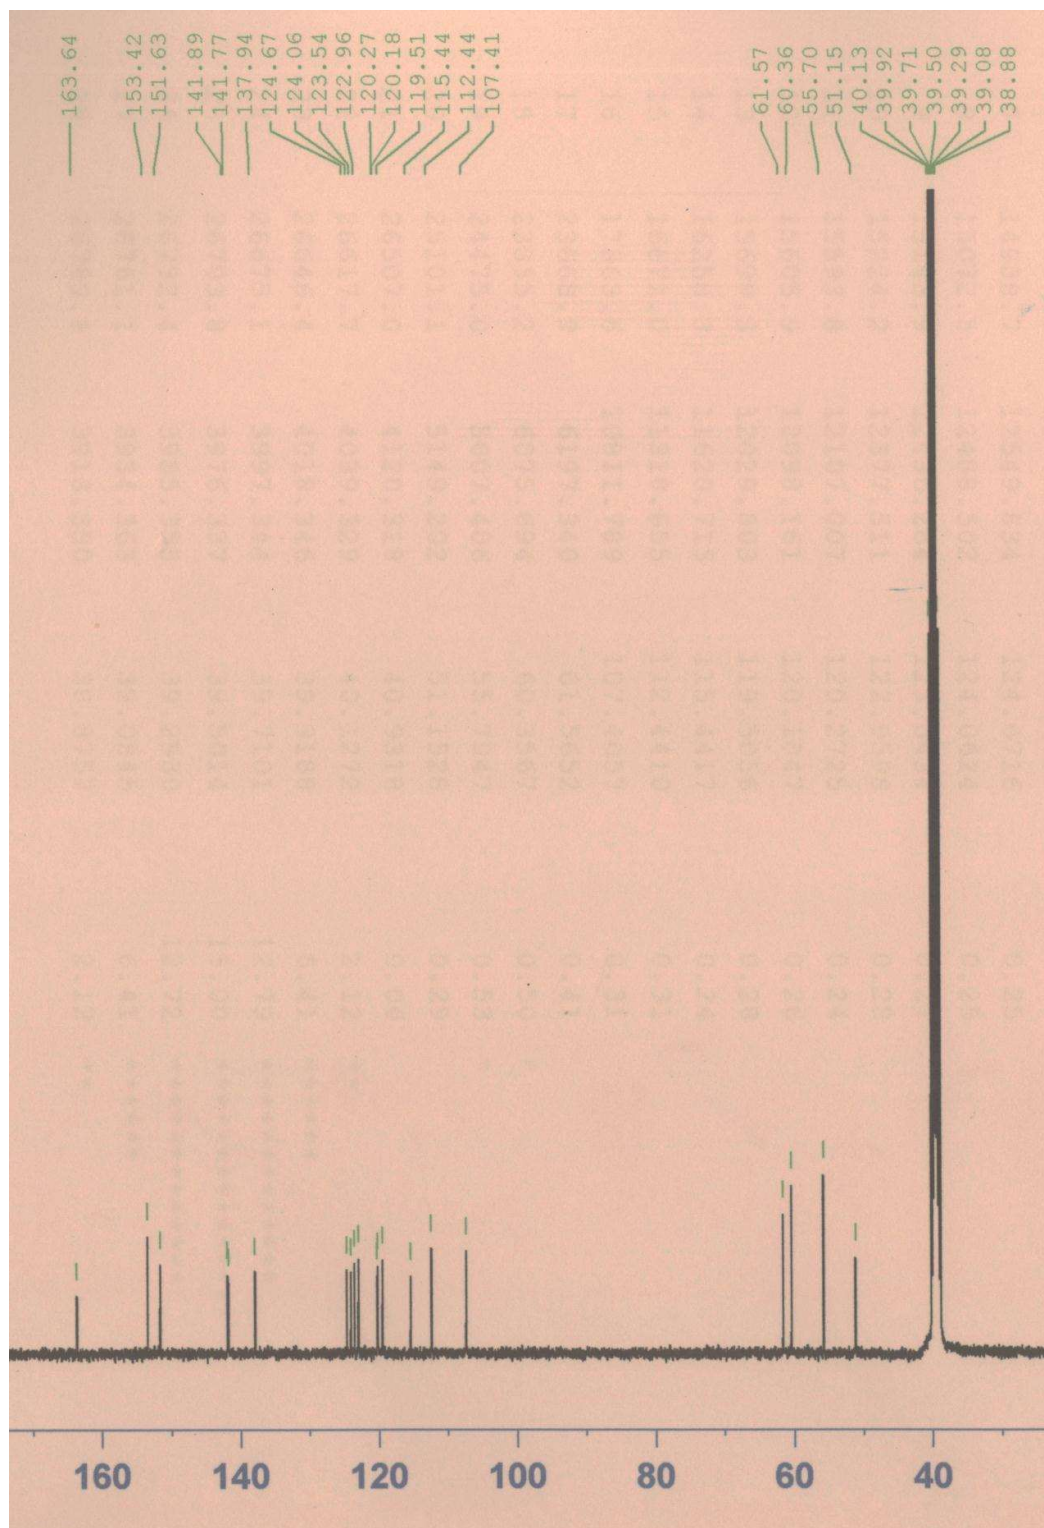

Figure S20.  $^{13}\text{C}$  NMR of 11

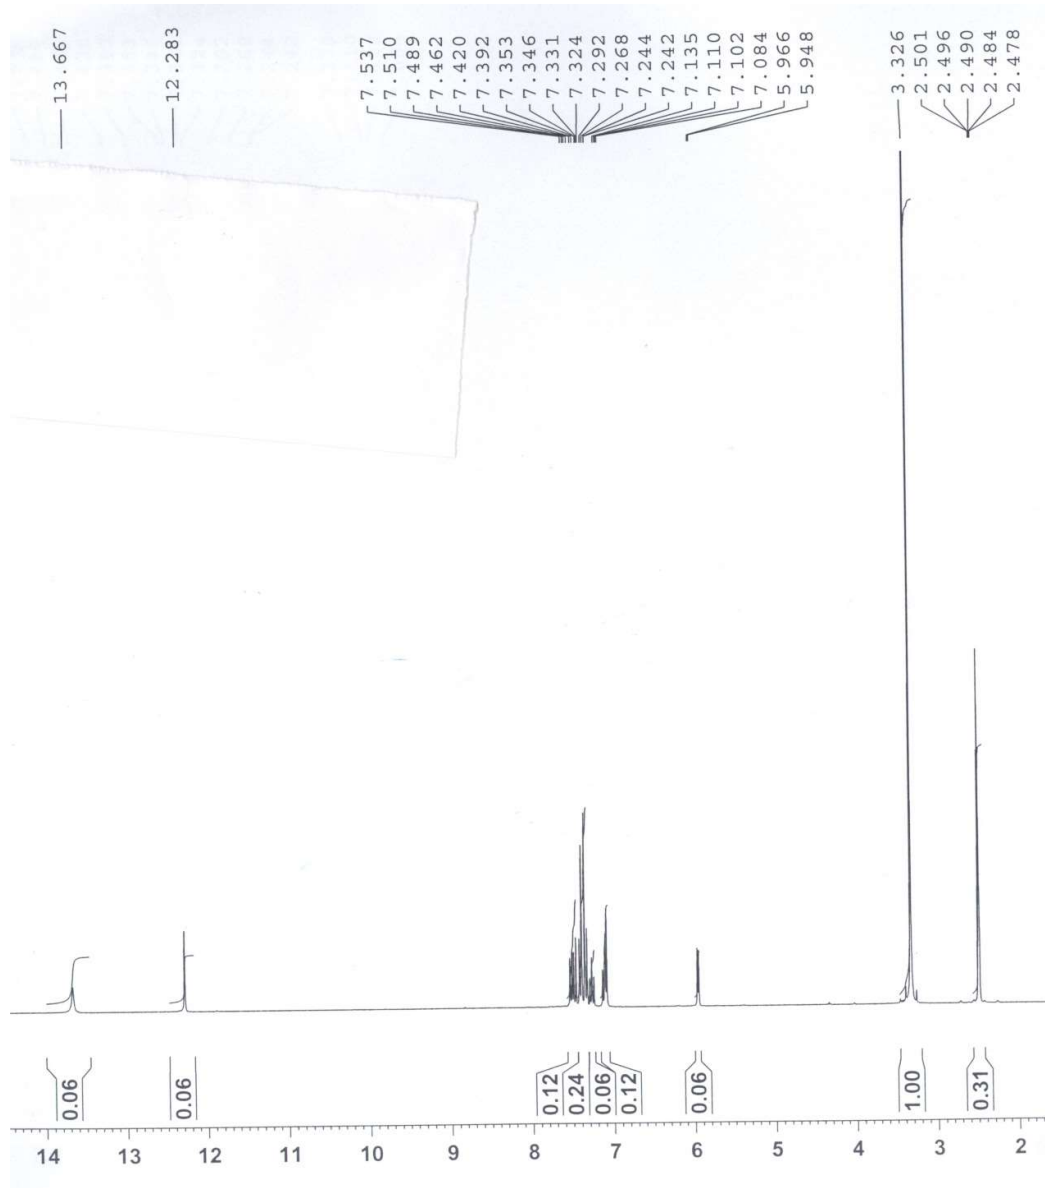

Figure S21.  $^1\text{H}$  NMR of 12

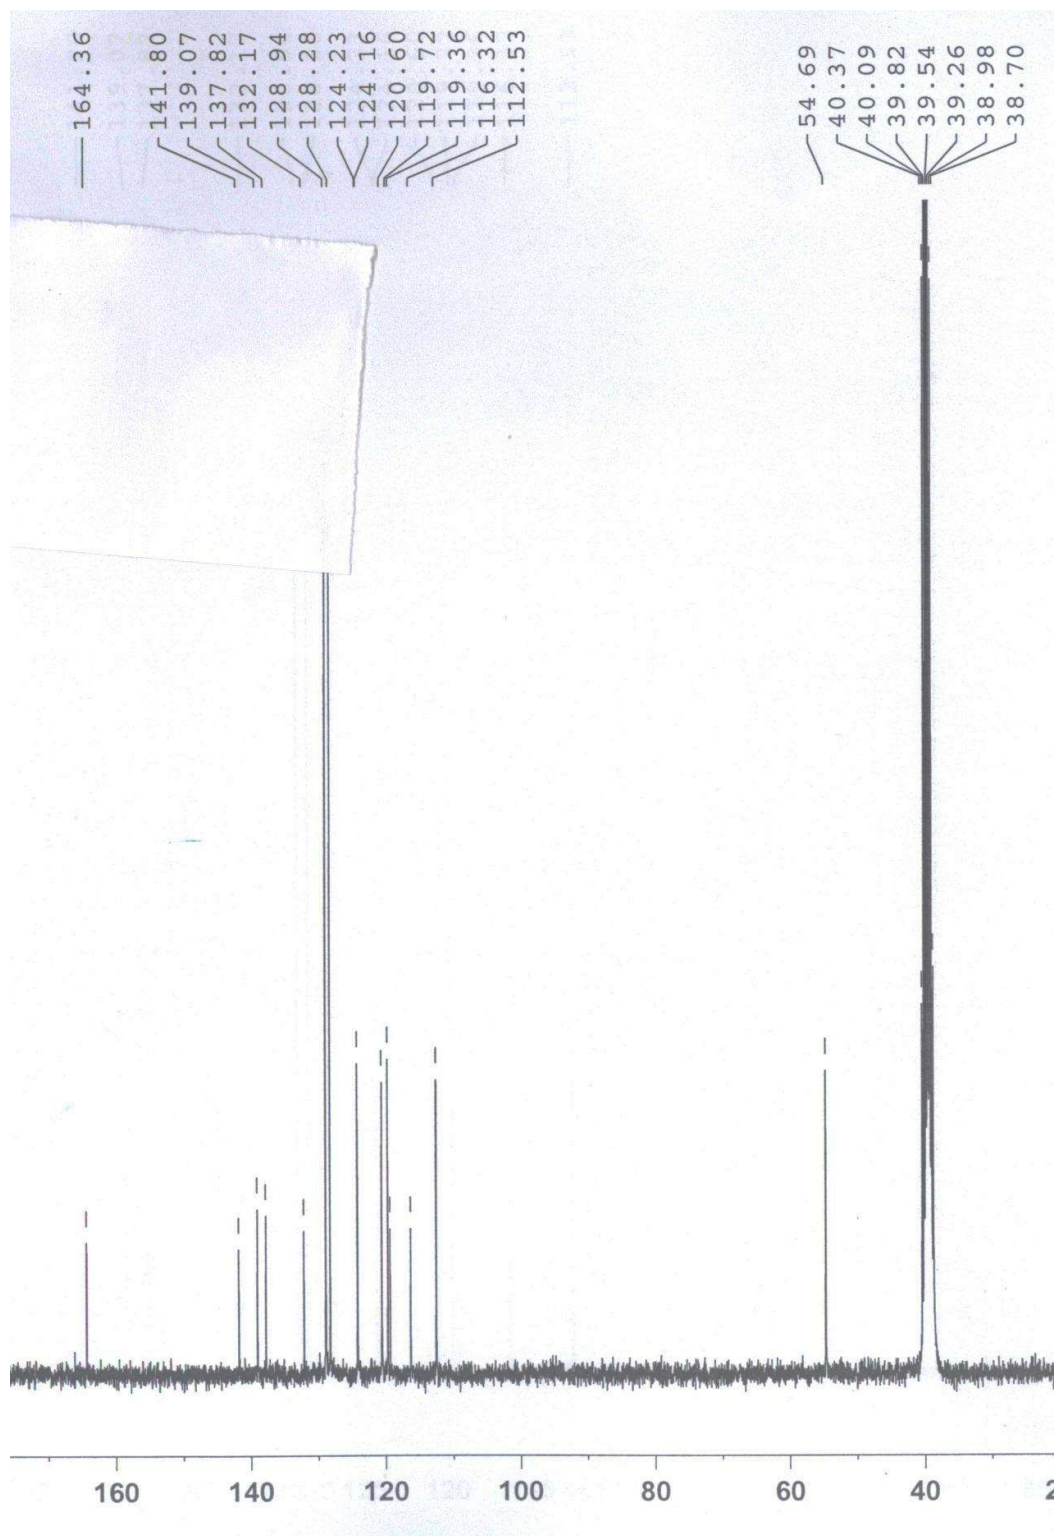

Figure S22.  $^{13}\text{C}$  NMR of 12

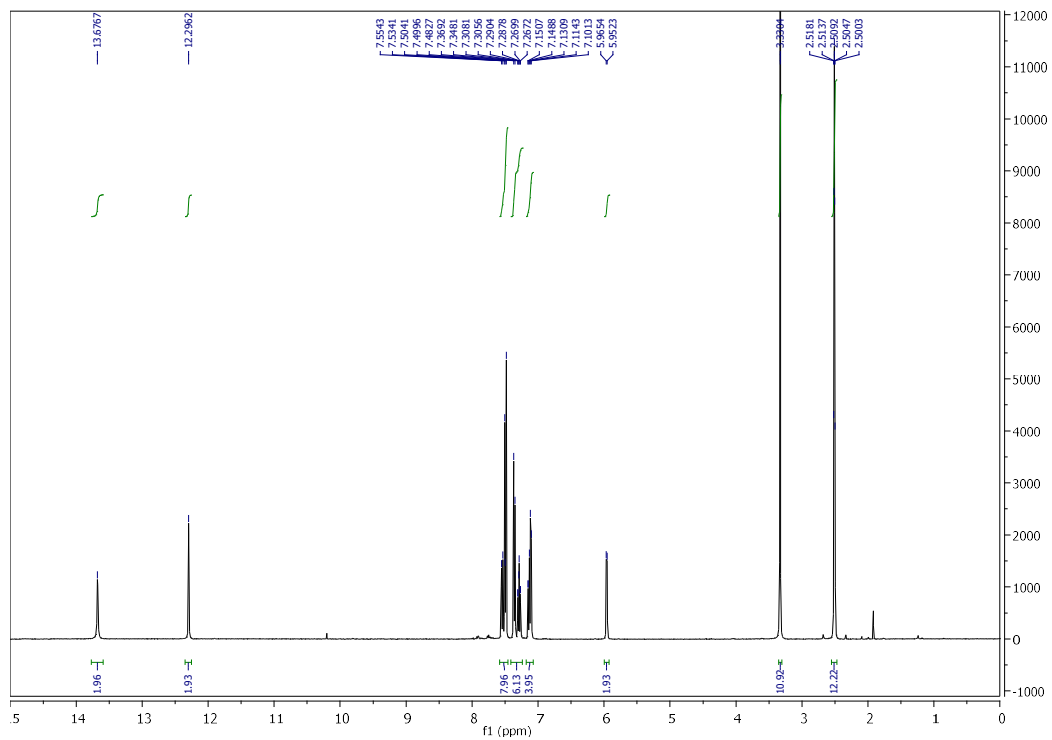

Figure S23.  $^1\text{H}$  NMR of 13

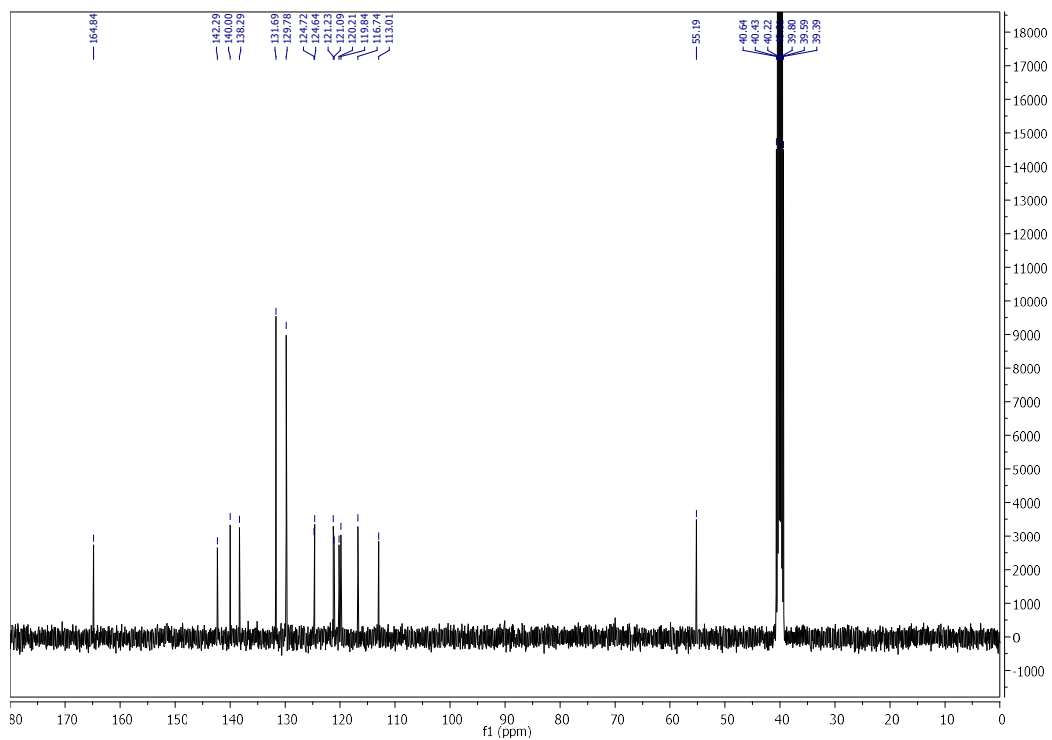

Figure S24.  $^{13}\text{C}$  NMR of 13

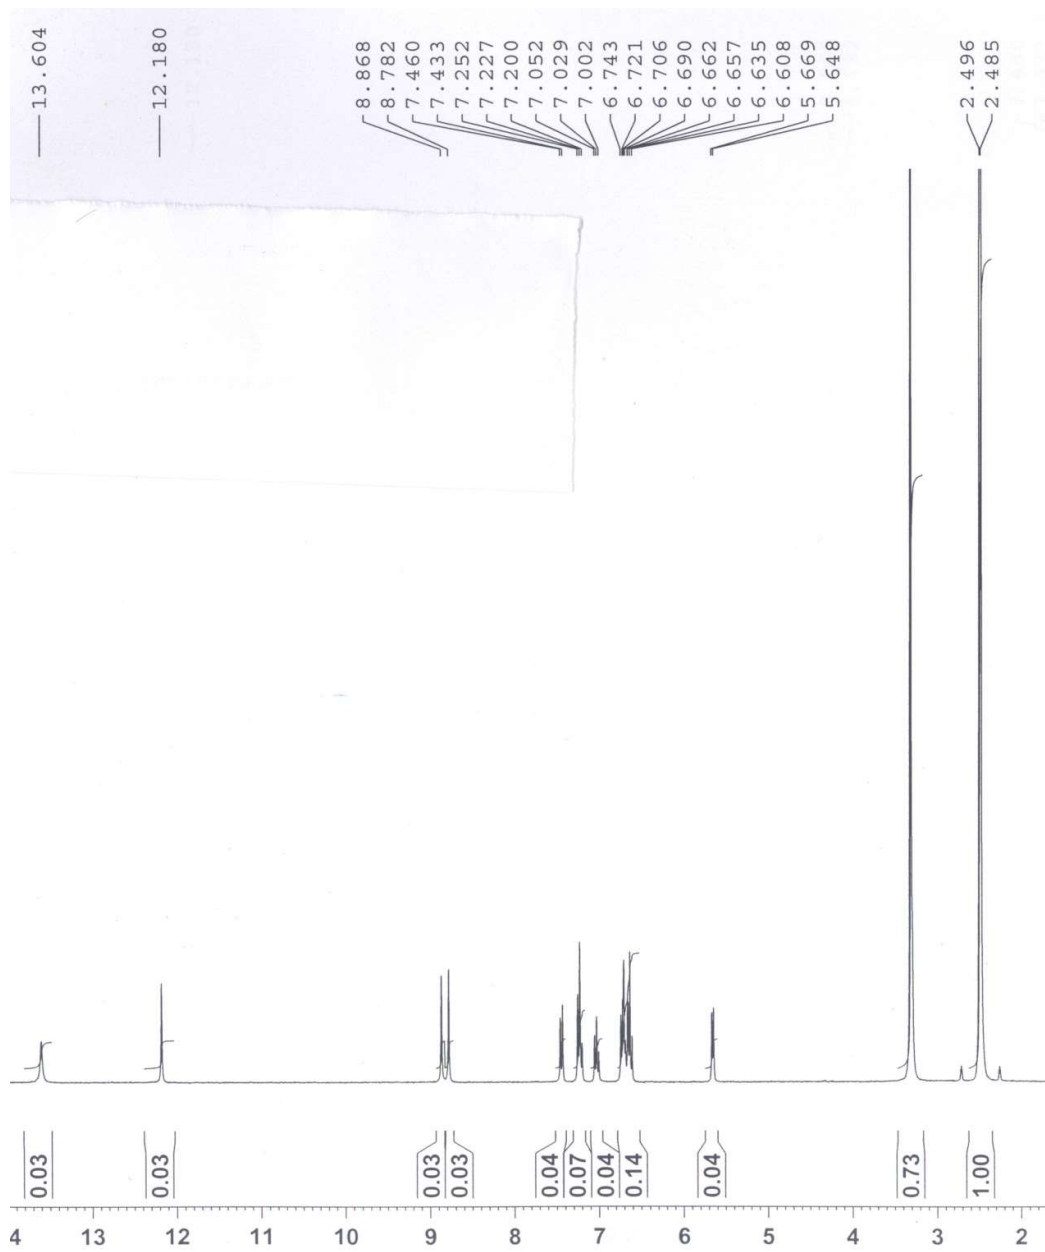

Figure S25.  $^1\text{H}$  NMR of 14



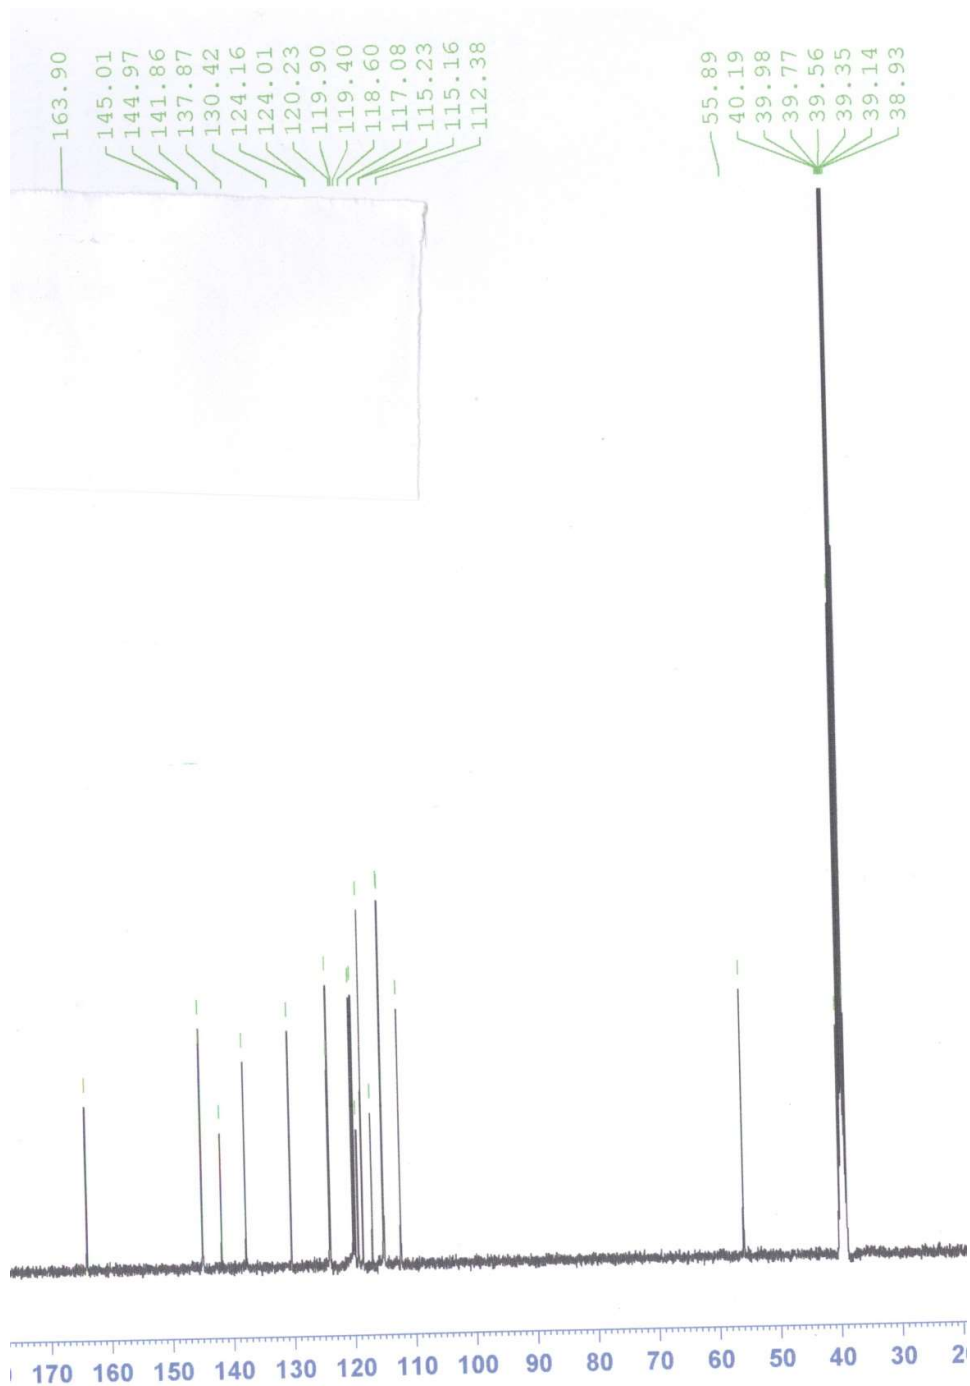

Figure S26.  $^{13}\text{C}$  NMR of 14



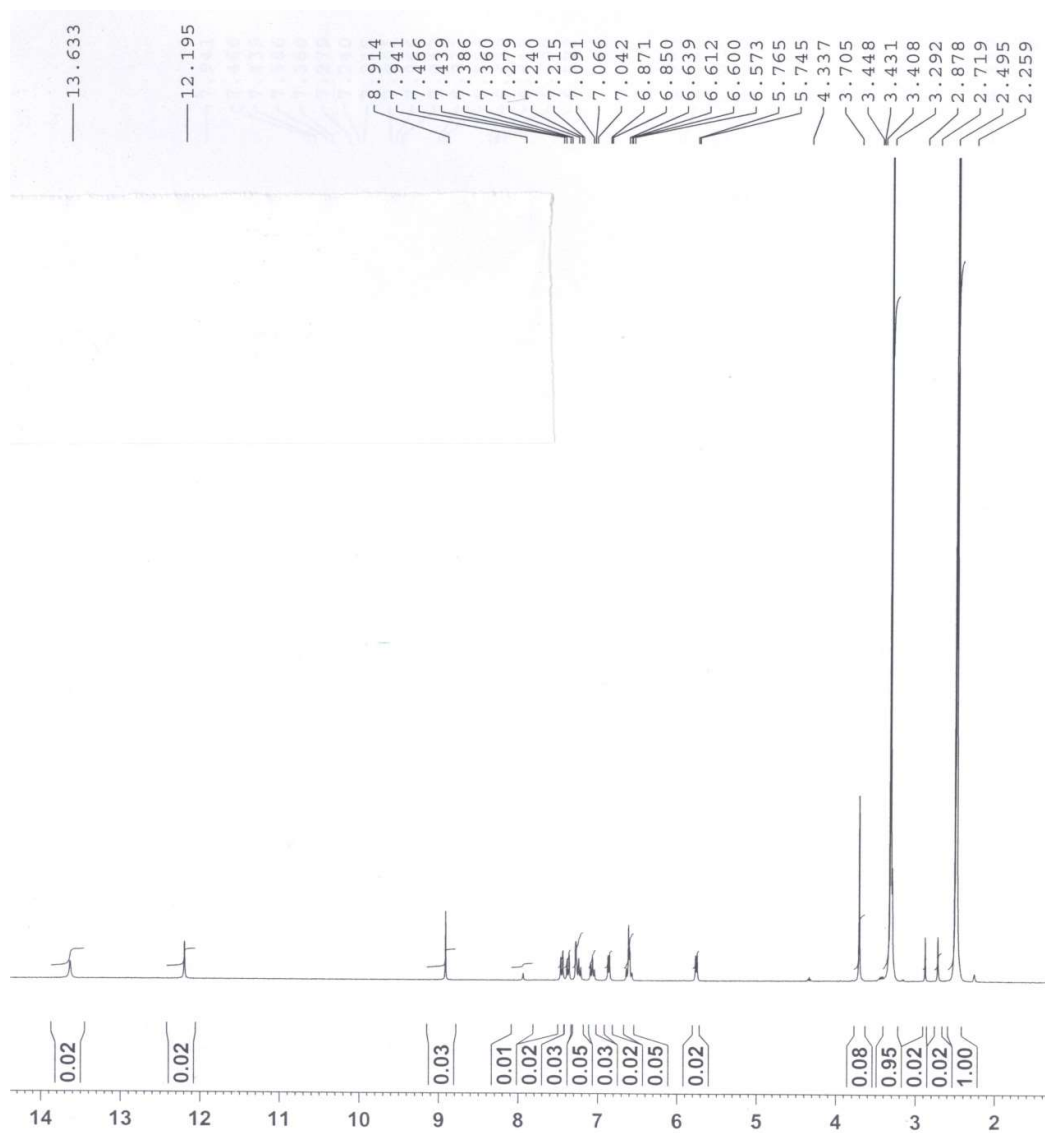

Figure S27.  $^1\text{H}$  NMR of 15

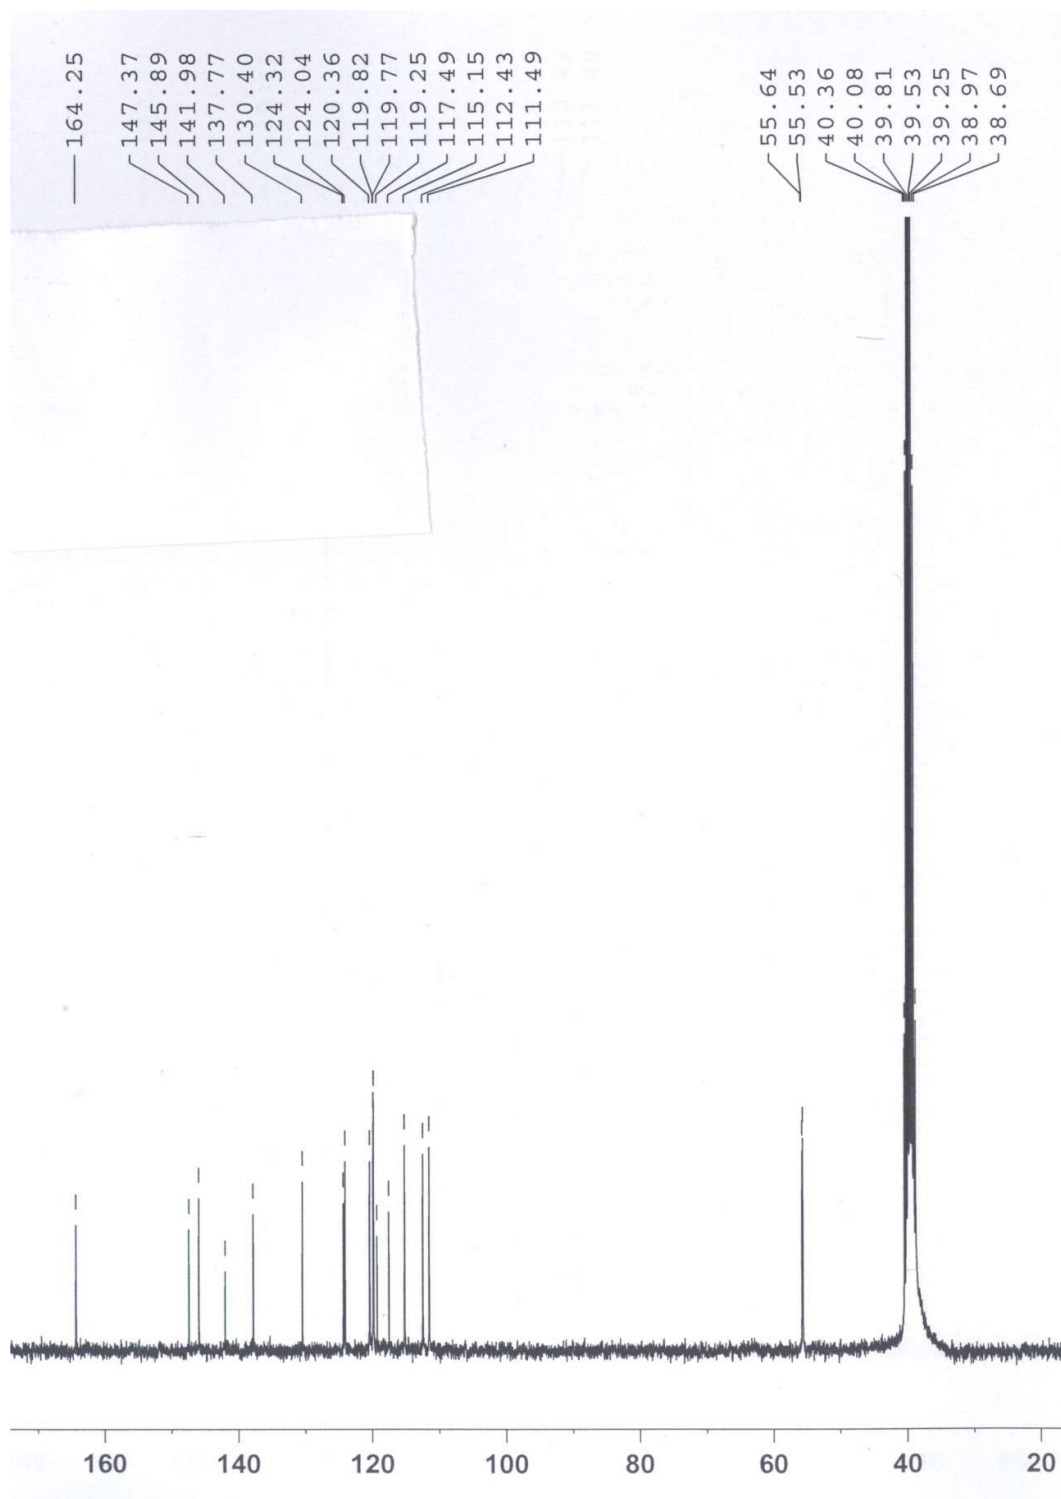

Figure S28.  $^{13}\text{C}$  NMR of 15

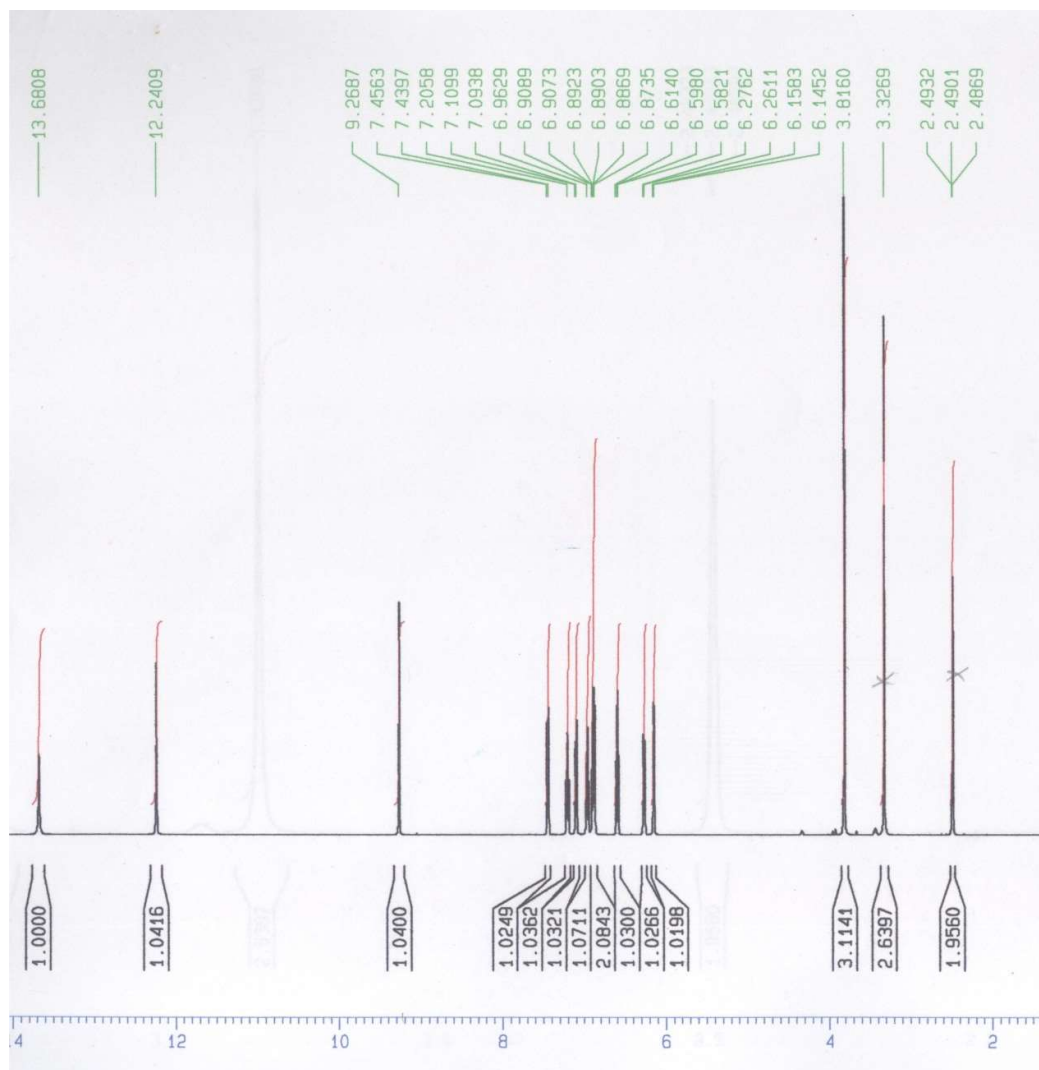

Figure S29.  $^1\text{H}$  NMR of 16

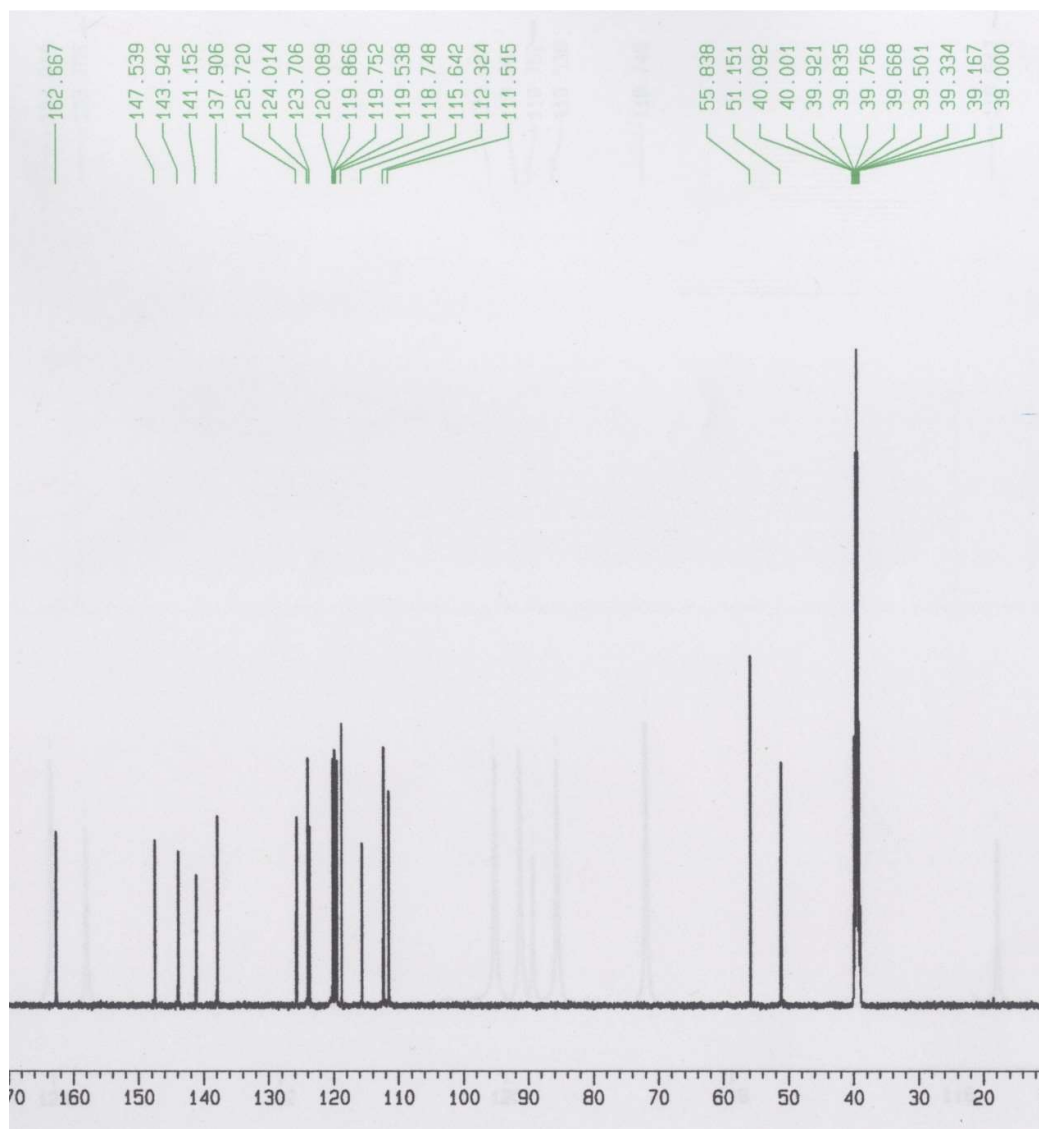

Figure S30.  $^{13}\text{C}$  NMR of 16

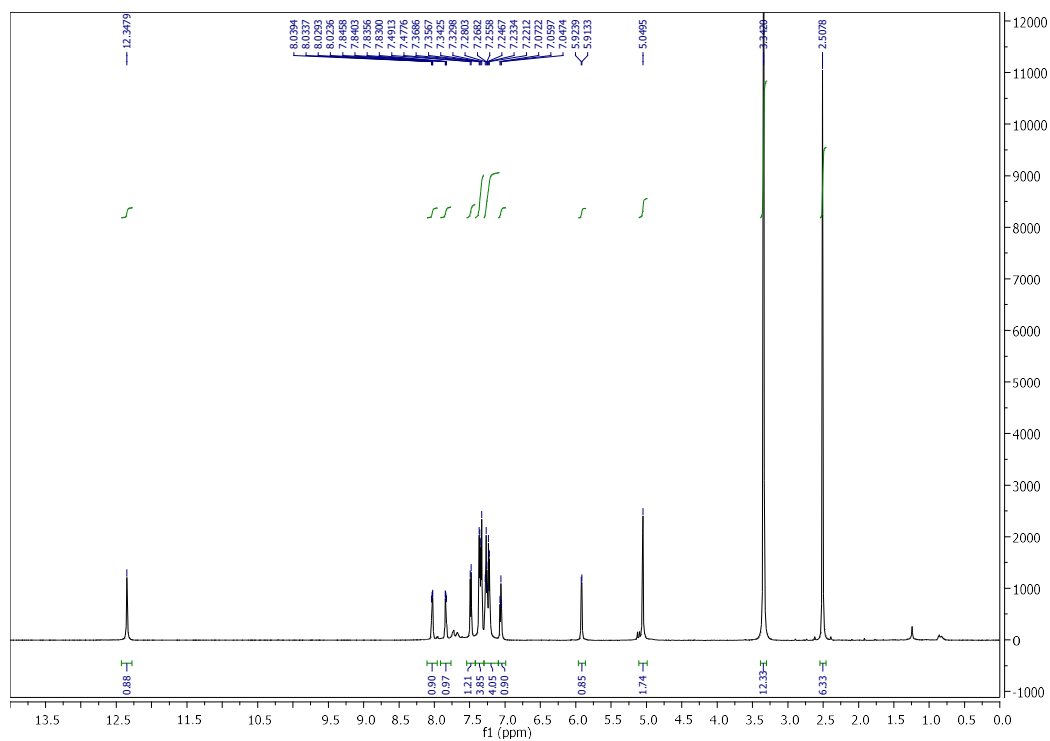

Figure S31.  $^1\text{H}$  NMR of 19

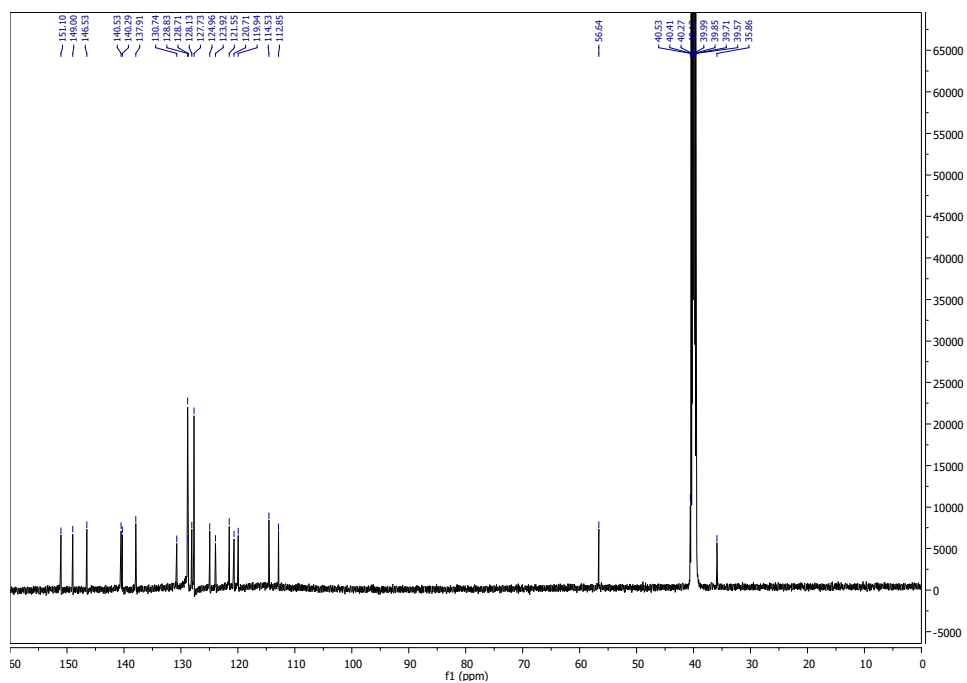

Figure S32.  $^{13}\text{C}$  NMR of 19

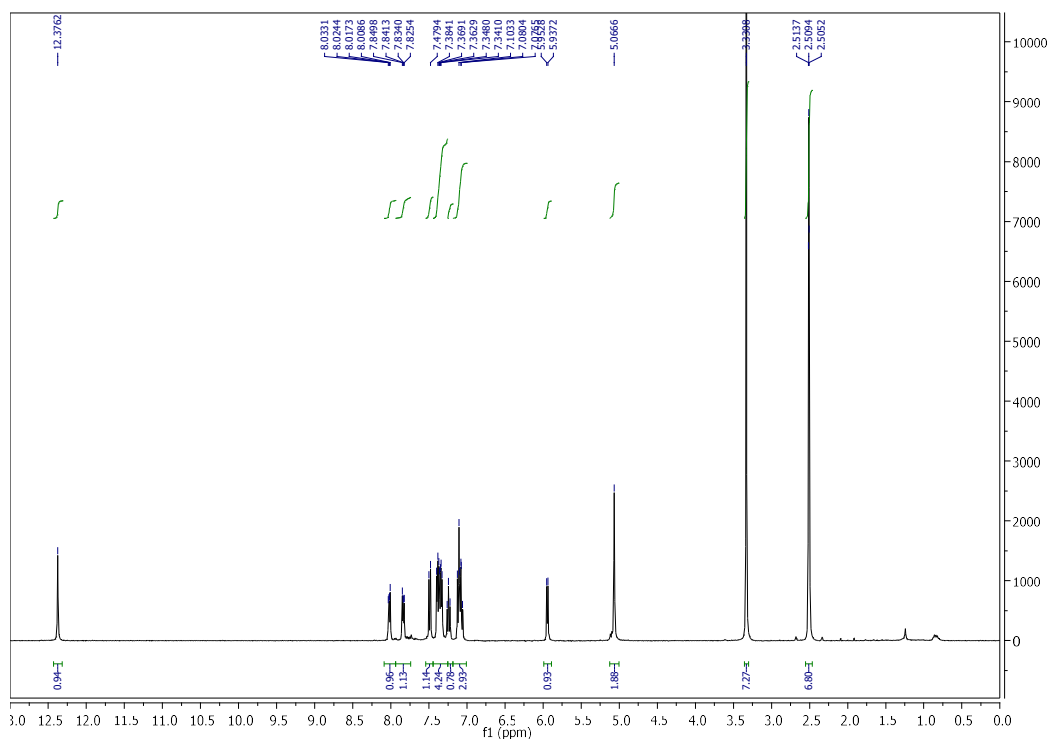

Figure S33. <sup>1</sup>H NMR of 20

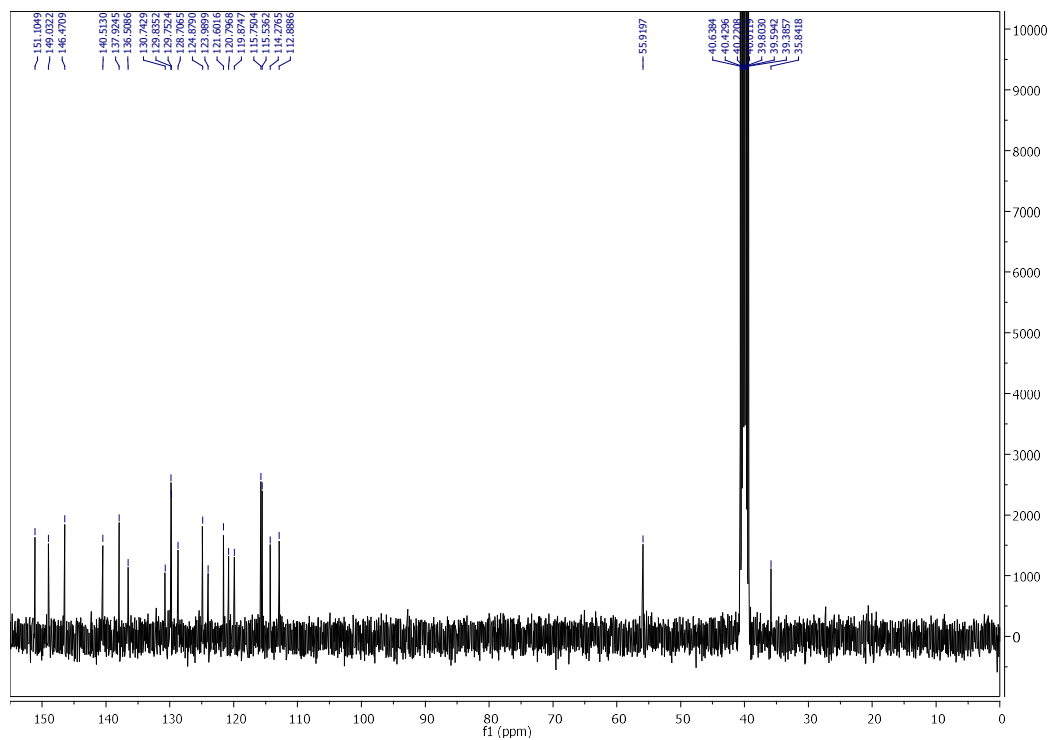

Figure S34. <sup>13</sup>C NMR of 20

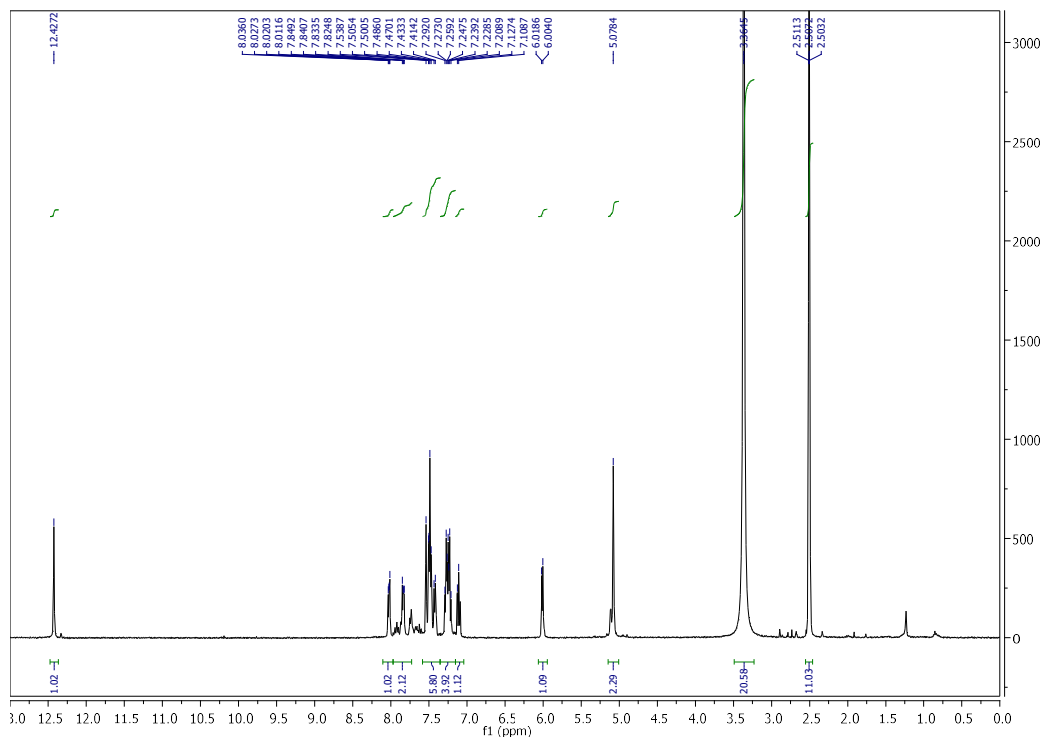

Figure S35.  $^1\text{H}$  NMR of 21

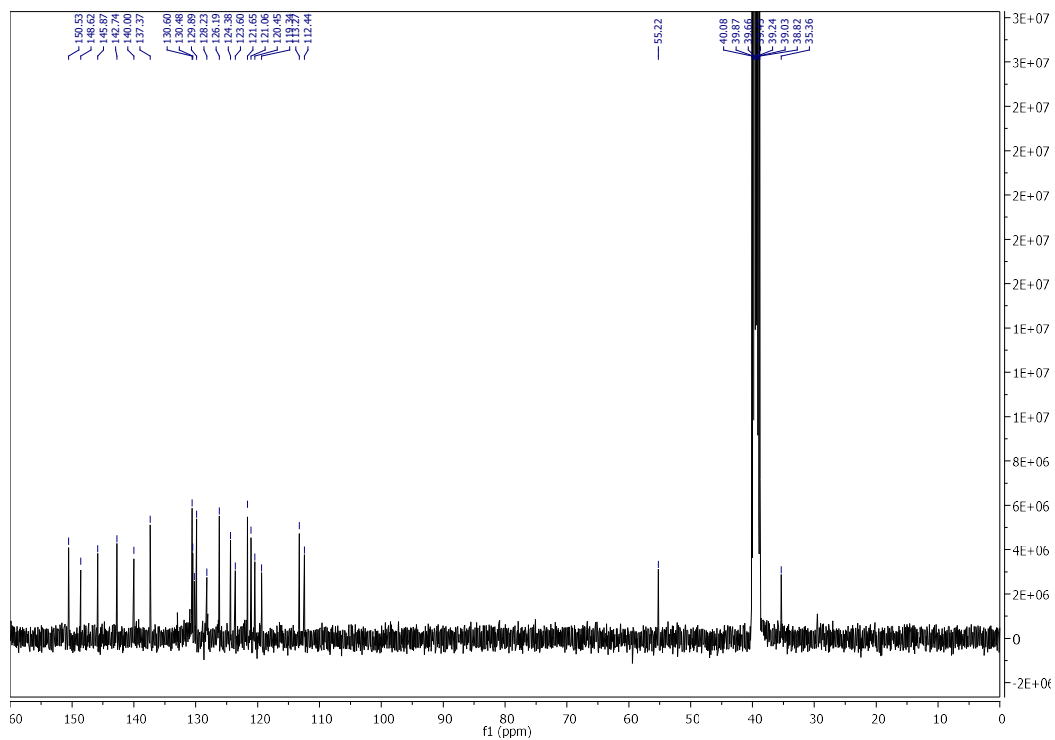

Figure S36.  $^{13}\text{C}$  NMR of 21

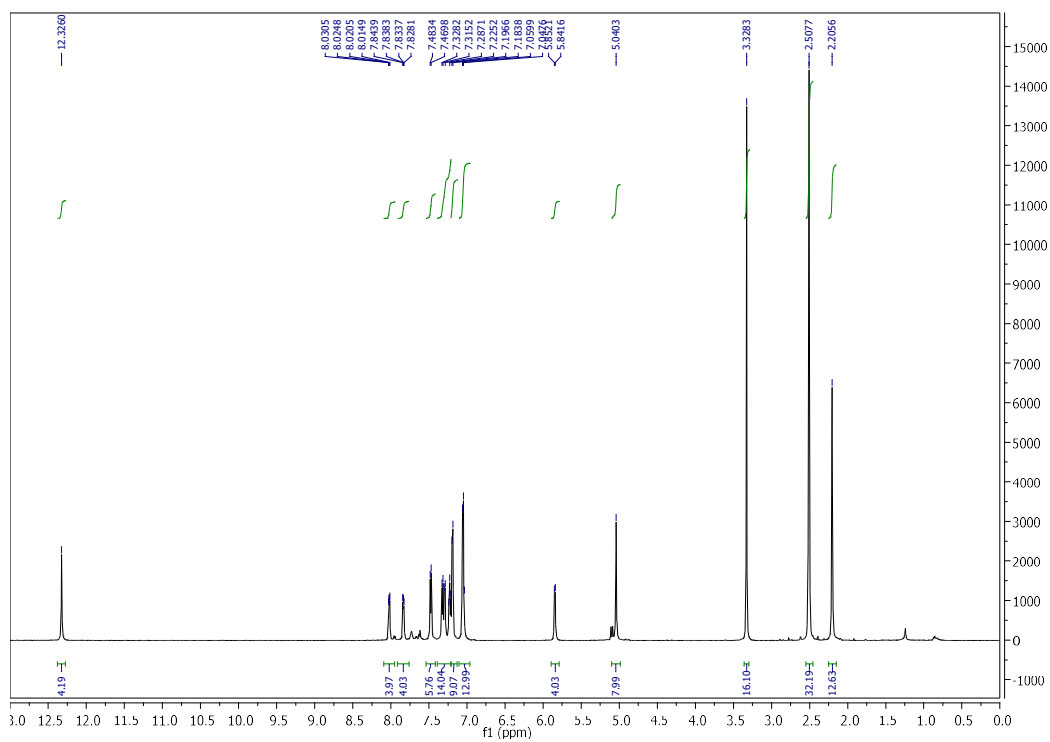

Figure S37.  $^1\text{H}$  NMR of 22

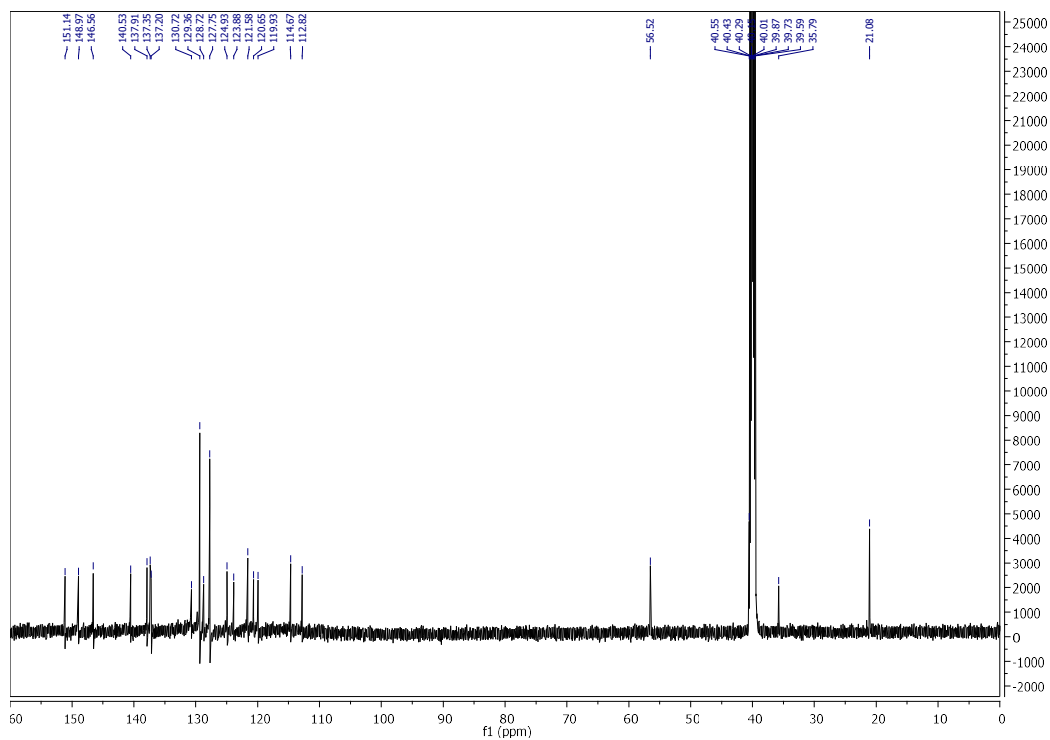

Figure S38.  $^{13}\text{C}$  NMR of 22



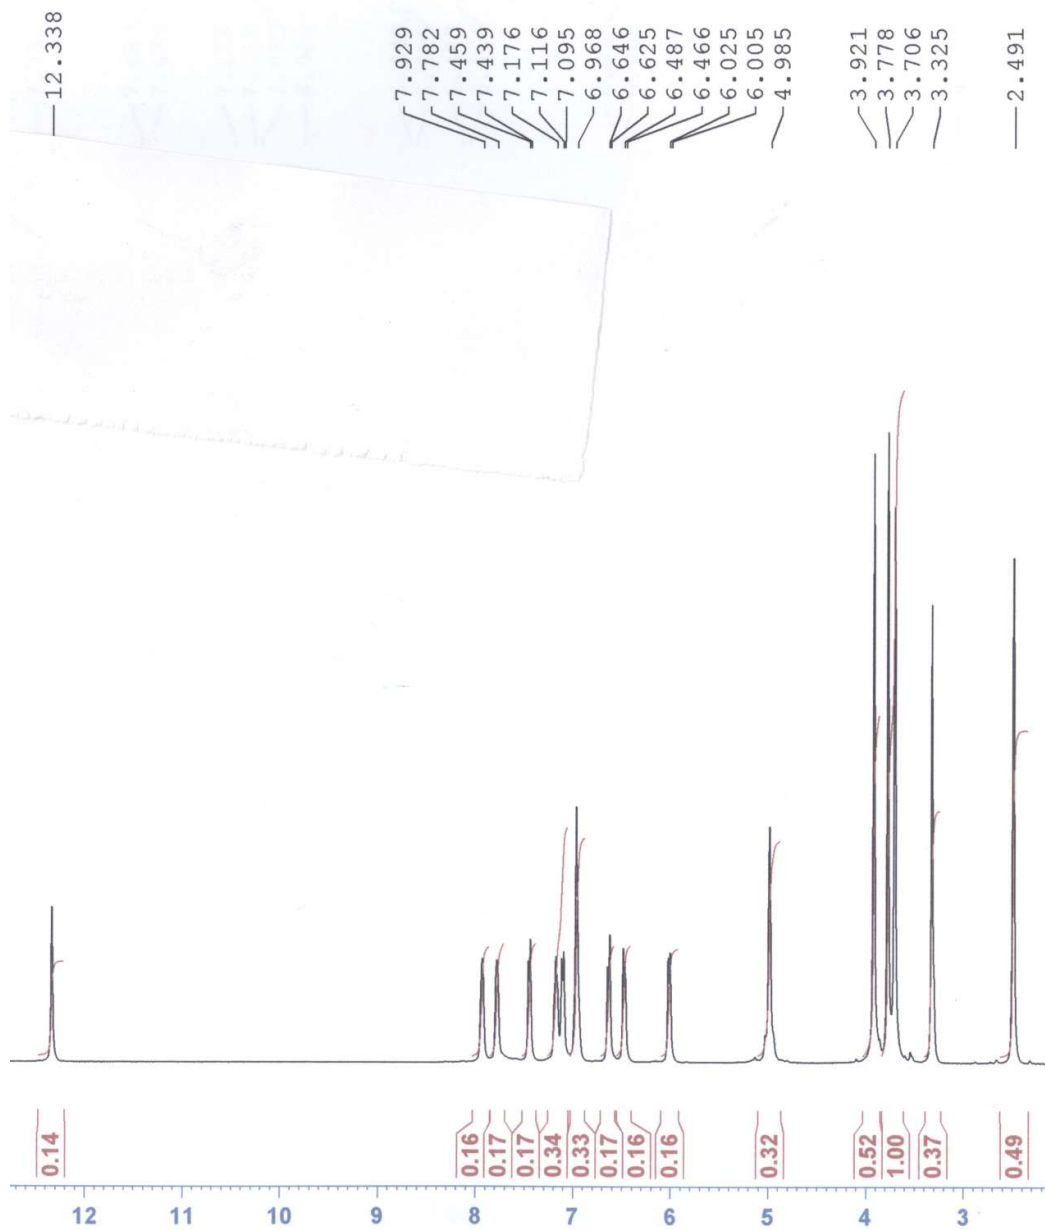

Figure S39.  $^1\text{H}$  NMR of 23

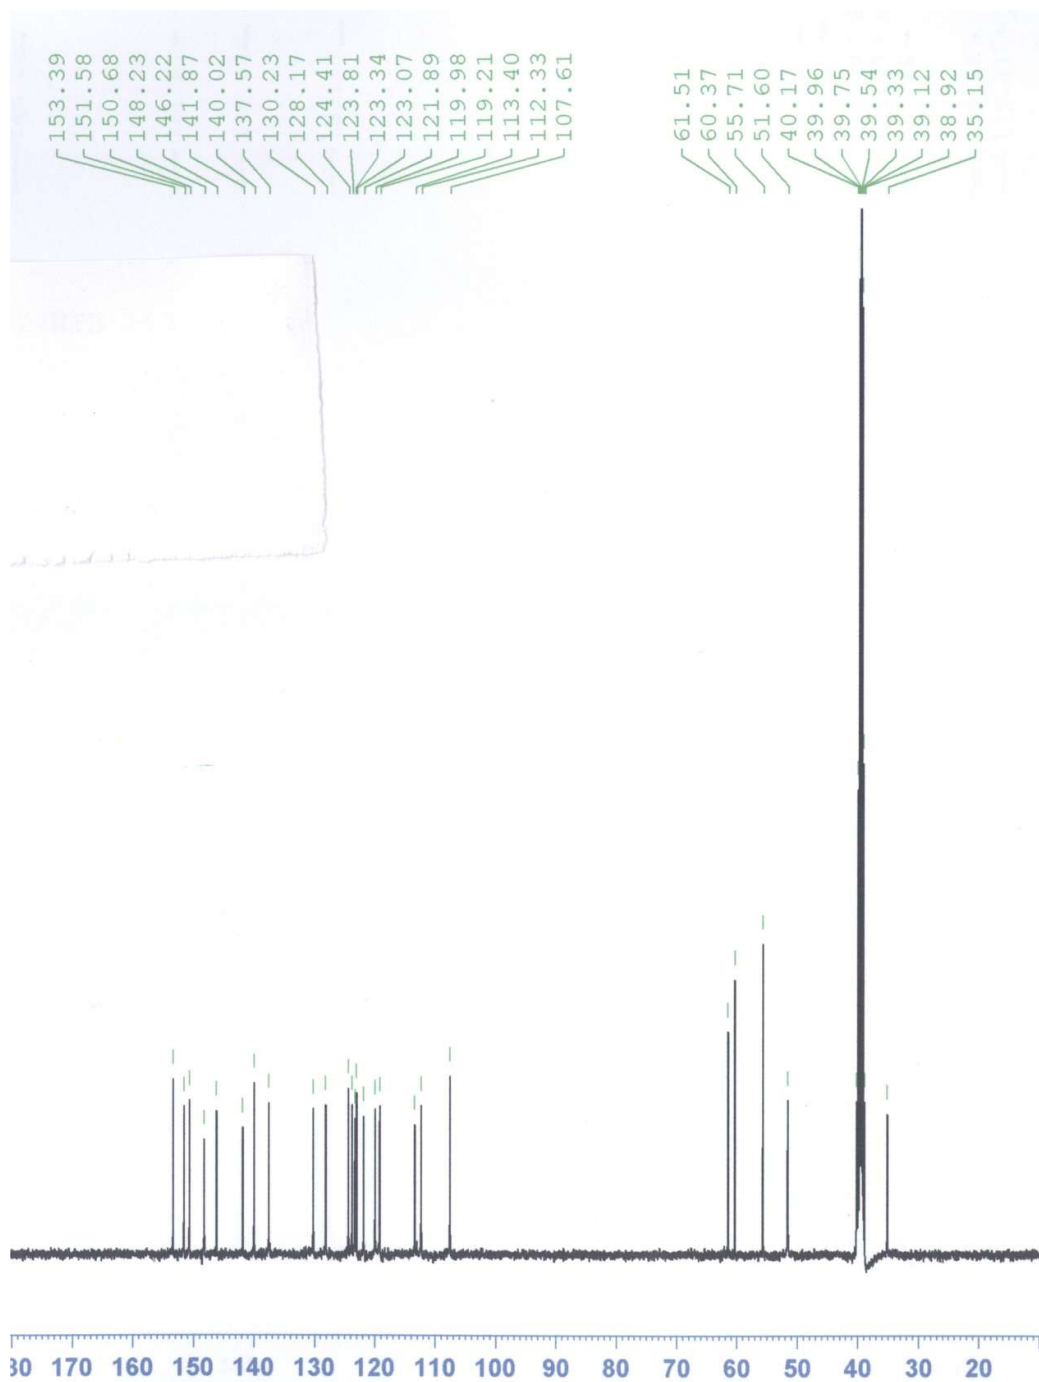

Figure S40.  $^{13}\text{C}$  NMR of 23

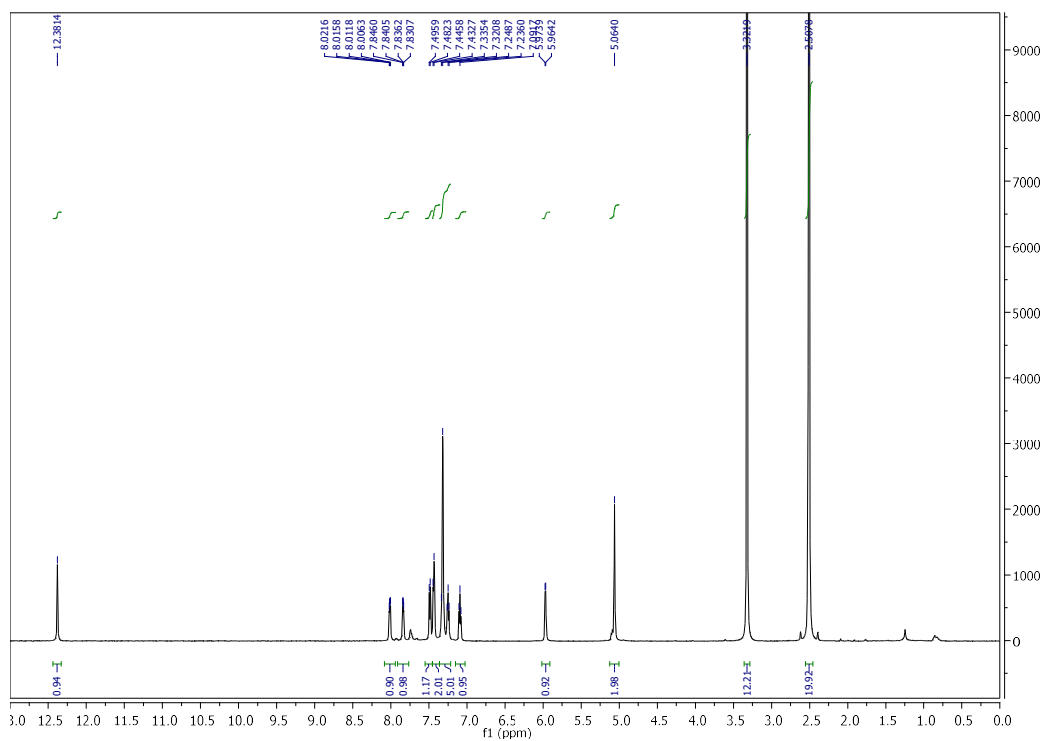

Figure S41. <sup>1</sup>H NMR of 24

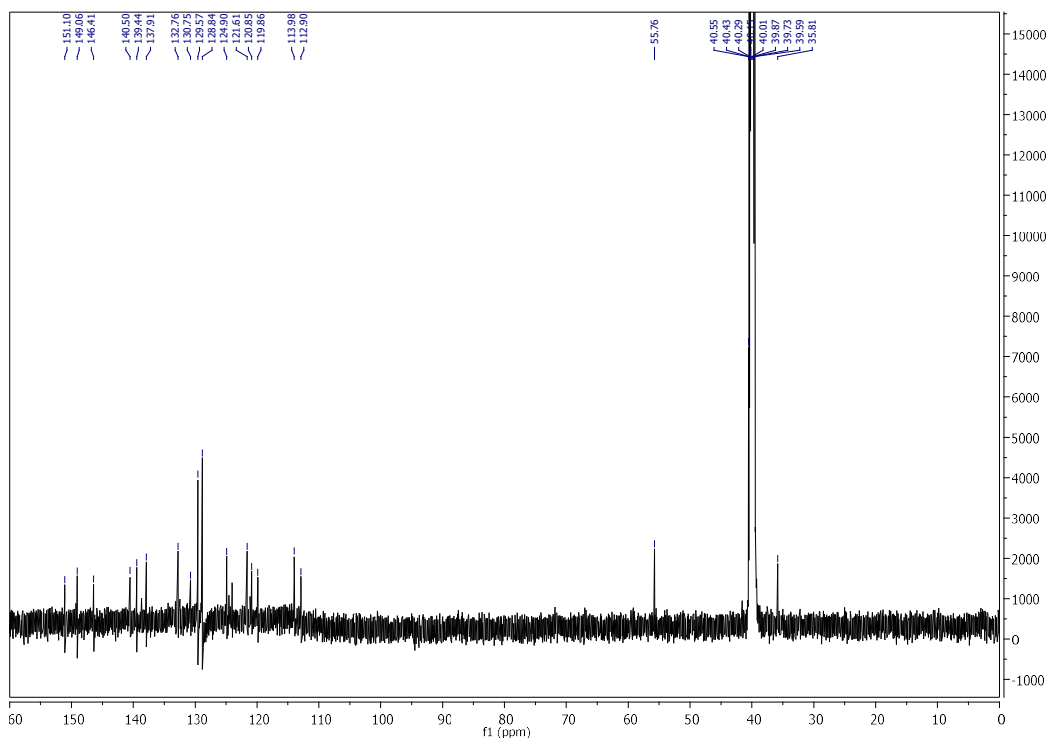

Figure S42. <sup>13</sup>C NMR of 24

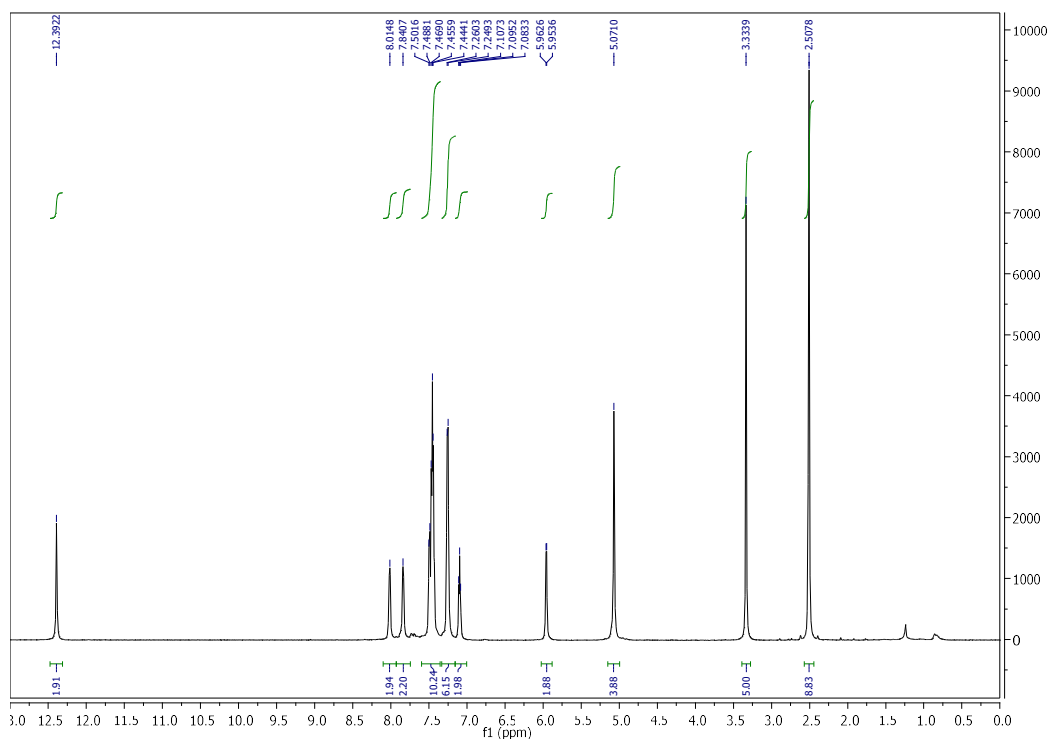

Figure S43. <sup>1</sup>H NMR of 25

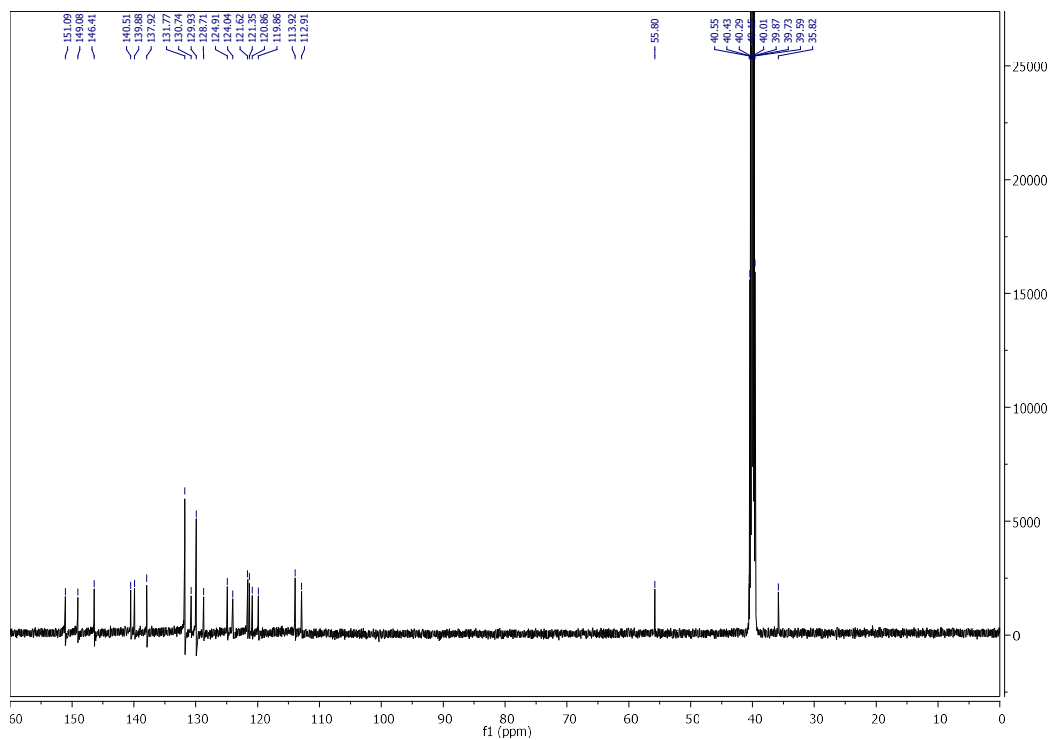

Figure S44. <sup>13</sup>C NMR of 25

# IR Spectra

**IR spectra were detected  
using Bruker Alpha ATR-  
FTIR.**

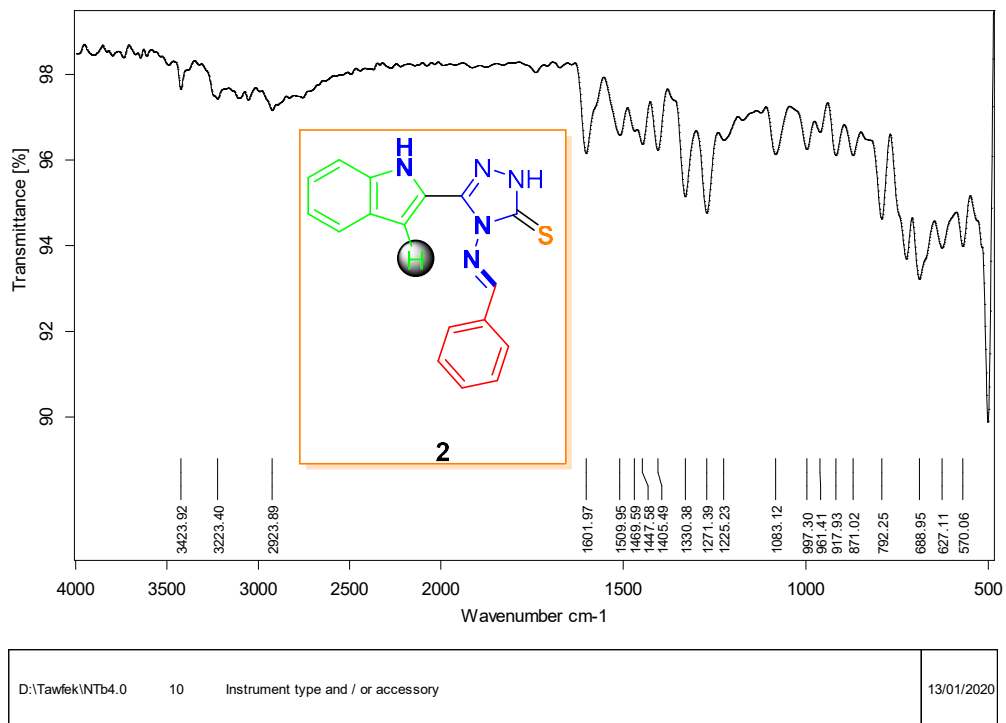

Page 1/1

Figure S45. IR of 2

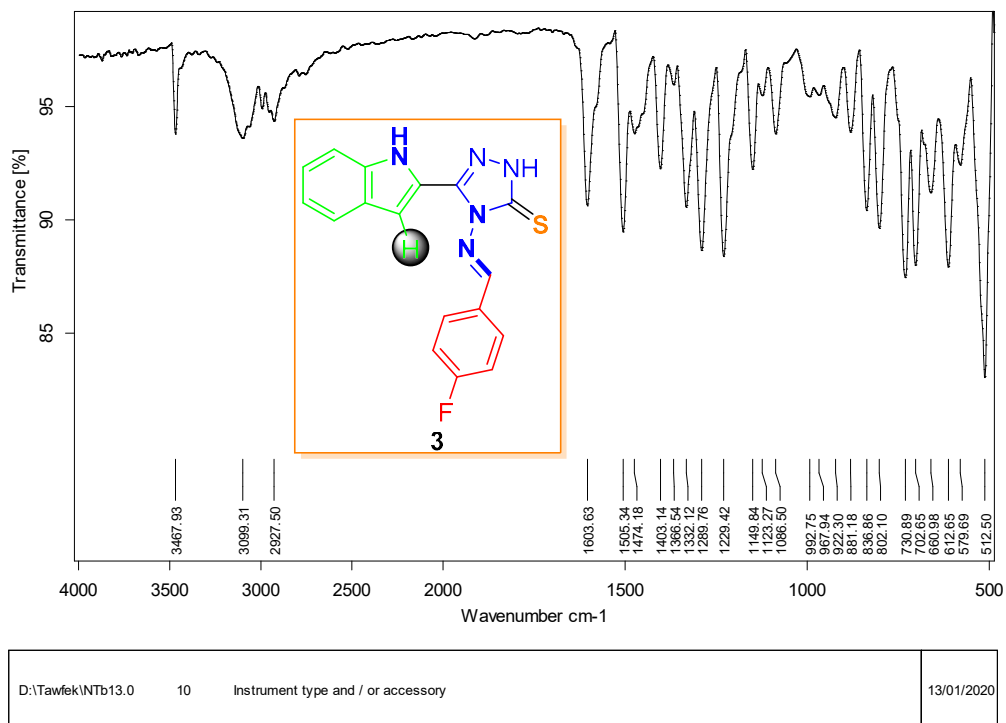

Page 1/1

Figure S46. IR of 3

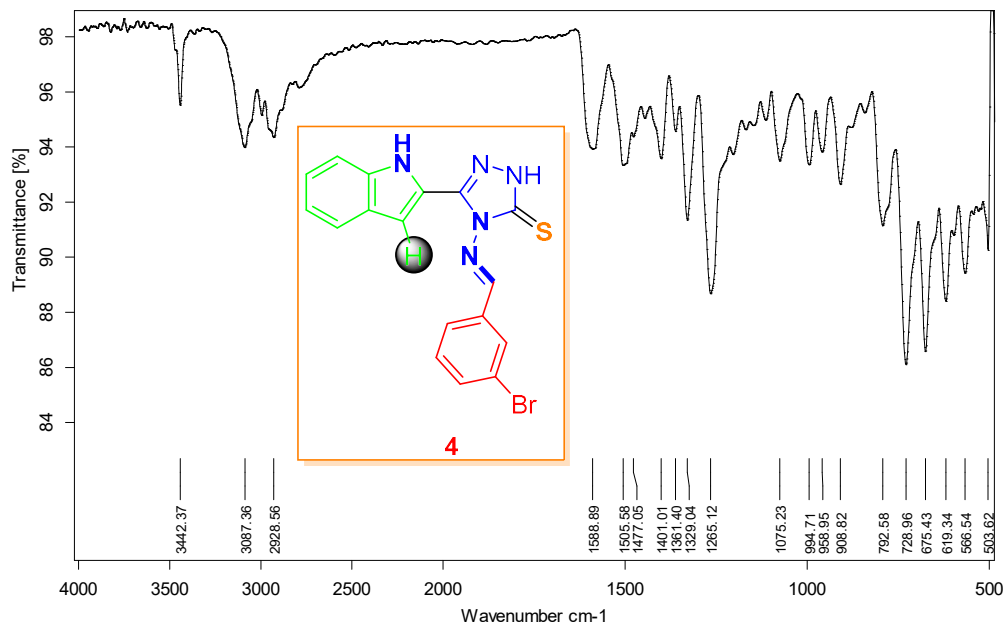

|                    |    |                                    |            |
|--------------------|----|------------------------------------|------------|
| D:\Tawfek\INTb21.0 | 10 | Instrument type and / or accessory | 13/01/2020 |
|--------------------|----|------------------------------------|------------|

Page 1/1

Figure S47. IR of 4

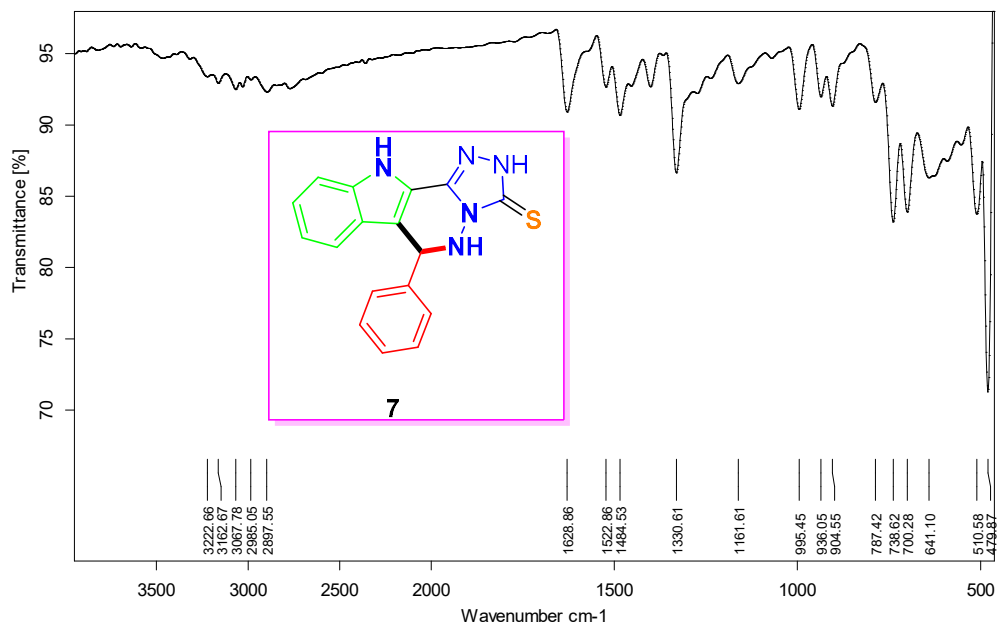

|                   |    |                                    |            |
|-------------------|----|------------------------------------|------------|
| D:\Tawfek\INTb3.0 | 10 | Instrument type and / or accessory | 13/01/2020 |
|-------------------|----|------------------------------------|------------|

Page 1/1

Figure S48. IR of 7

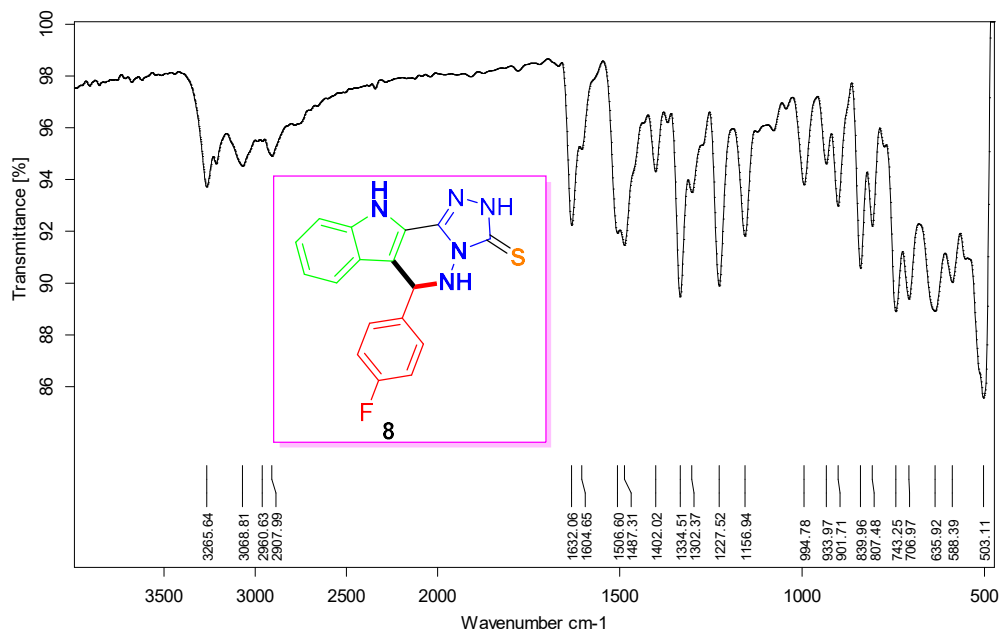

|                   |    |                                    |            |
|-------------------|----|------------------------------------|------------|
| D:\Tawfek\INTb5.0 | 10 | Instrument type and / or accessory | 13/01/2020 |
|-------------------|----|------------------------------------|------------|

Page 1/1

Figure S49. IR of 8

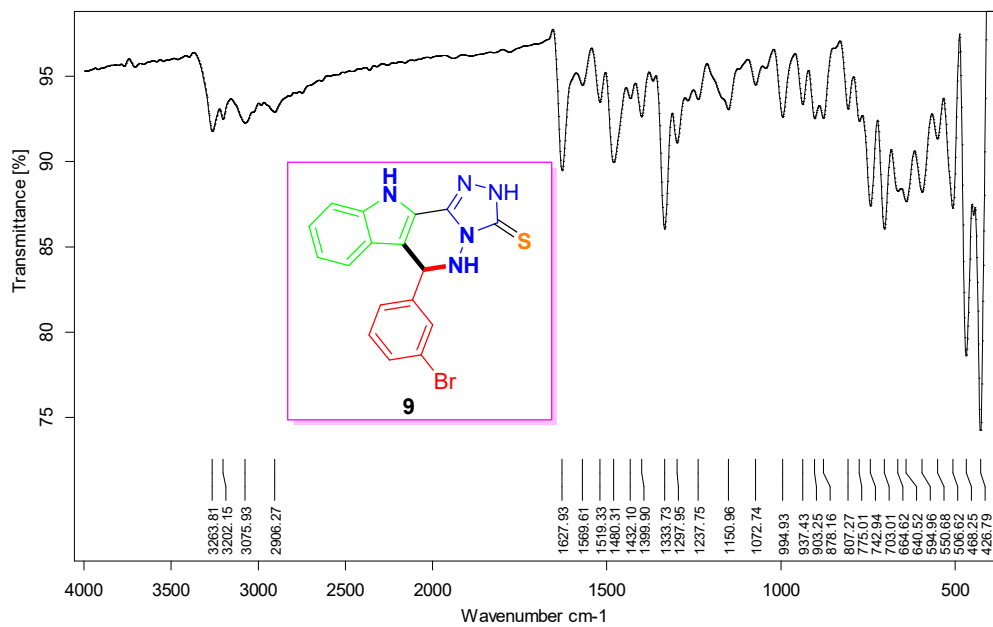

|                    |    |                                    |            |
|--------------------|----|------------------------------------|------------|
| D:\Tawfek\INTb22.0 | 10 | Instrument type and / or accessory | 13/01/2020 |
|--------------------|----|------------------------------------|------------|

Page 1/1

Figure S50. IR of 9



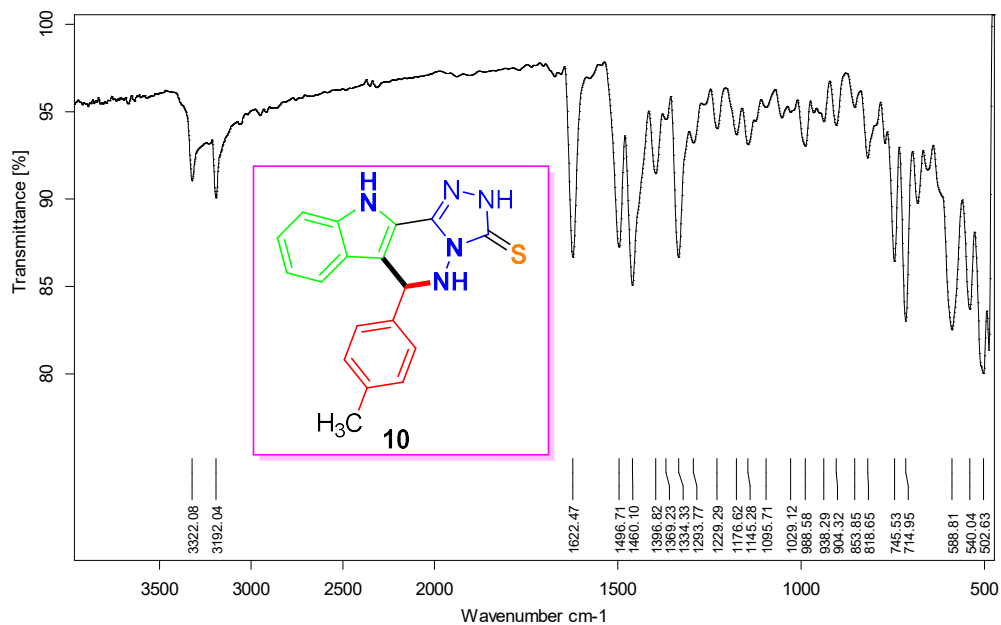

|                    |    |                                    |            |
|--------------------|----|------------------------------------|------------|
| D:\Tawfek\INTb10.0 | 10 | Instrument type and / or accessory | 13/01/2020 |
|--------------------|----|------------------------------------|------------|

Page 1/1

Figure S51. IR of 10

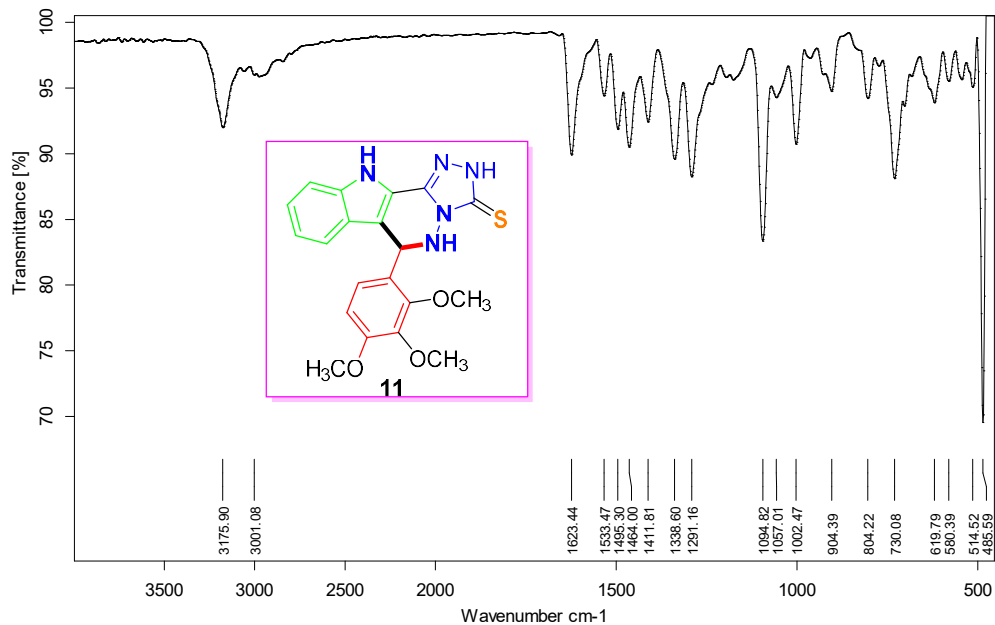

|                   |    |                                    |            |
|-------------------|----|------------------------------------|------------|
| D:\Tawfek\INTb8.0 | 10 | Instrument type and / or accessory | 13/01/2020 |
|-------------------|----|------------------------------------|------------|

Page 1/1

Figure S52. IR of 11

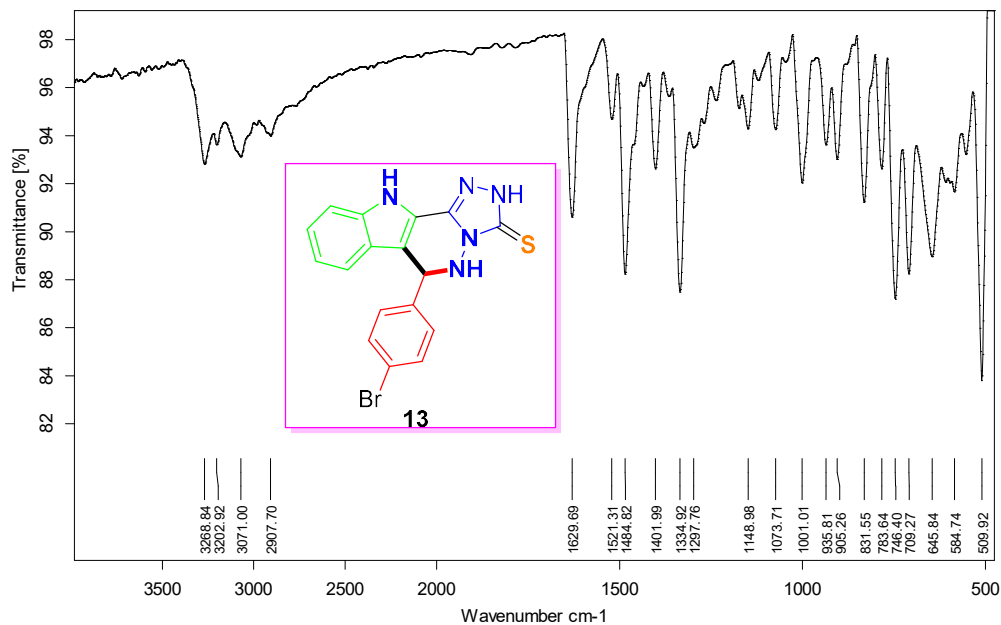

|                    |    |                                    |            |
|--------------------|----|------------------------------------|------------|
| D:\Tawfek\INTb11.0 | 10 | Instrument type and / or accessory | 13/01/2020 |
|--------------------|----|------------------------------------|------------|

Page 1/1

Figure S53. IR of 13

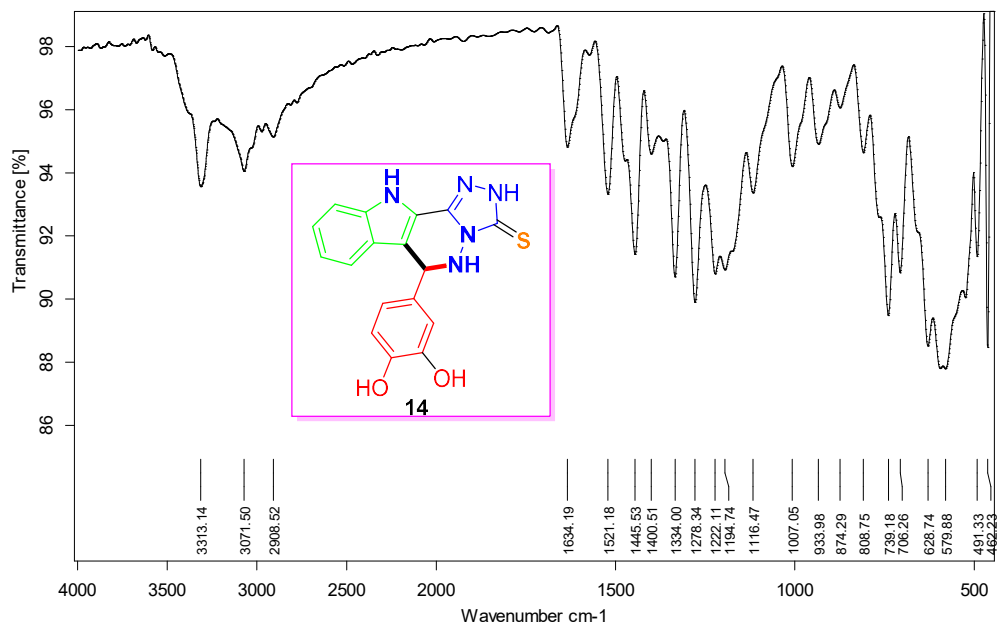

|                    |    |                                    |            |
|--------------------|----|------------------------------------|------------|
| D:\Tawfek\INTb88.0 | 10 | Instrument type and / or accessory | 13/01/2020 |
|--------------------|----|------------------------------------|------------|

Page 1/1

Figure S54. IR of 14

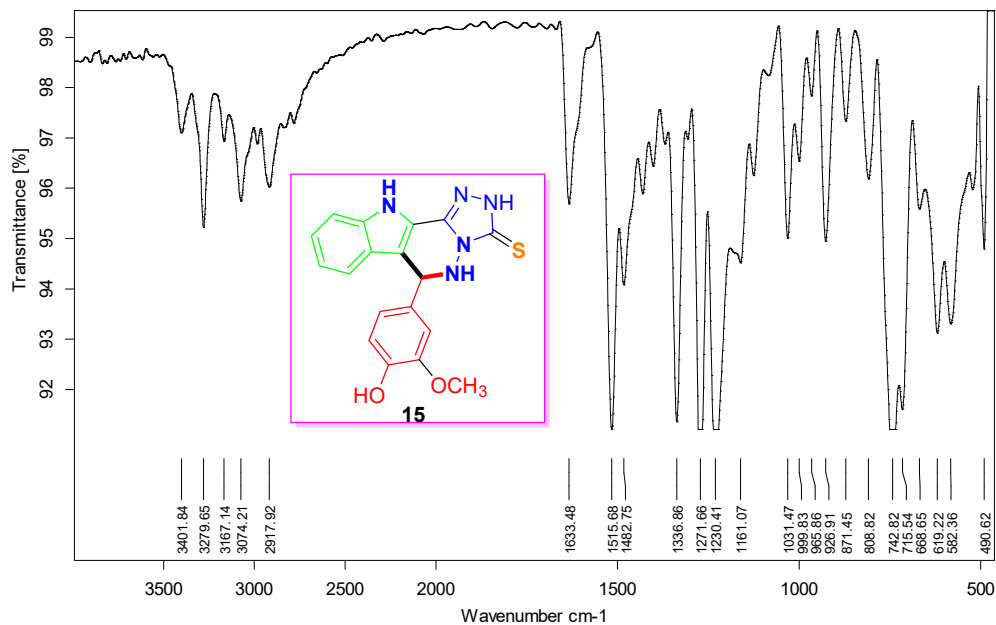

|                   |    |                                    |            |
|-------------------|----|------------------------------------|------------|
| D:\Tawfek\INTb6.0 | 10 | Instrument type and / or accessory | 13/01/2020 |
|-------------------|----|------------------------------------|------------|

Page 1/1

Figure S55. IR of 15

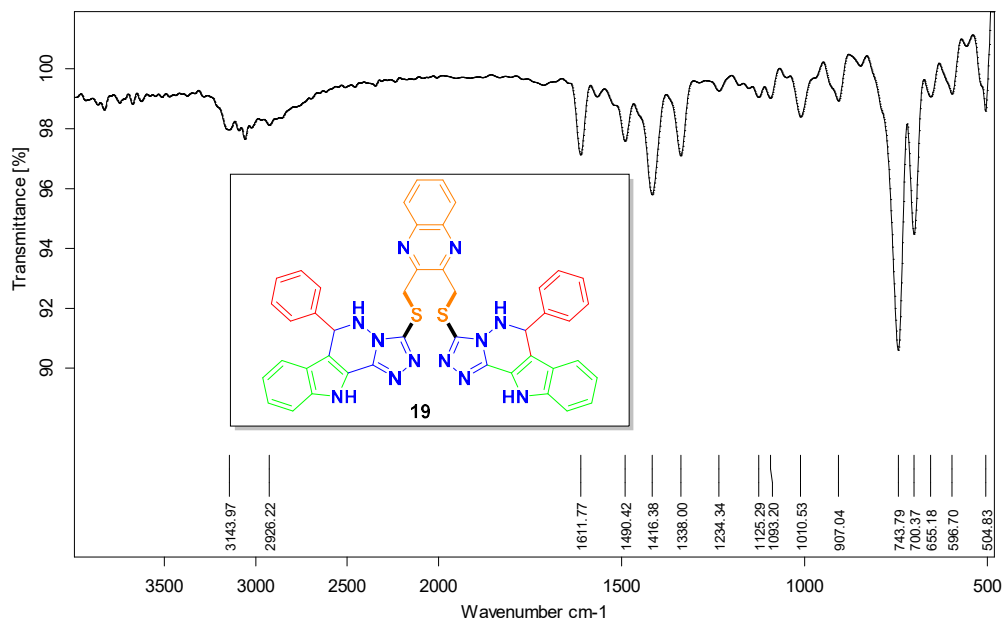

|                     |    |                                    |            |
|---------------------|----|------------------------------------|------------|
| D:\Tawfek\INTb114.0 | 10 | Instrument type and / or accessory | 13/01/2020 |
|---------------------|----|------------------------------------|------------|

Page 1/1

Figure S56. IR of 19

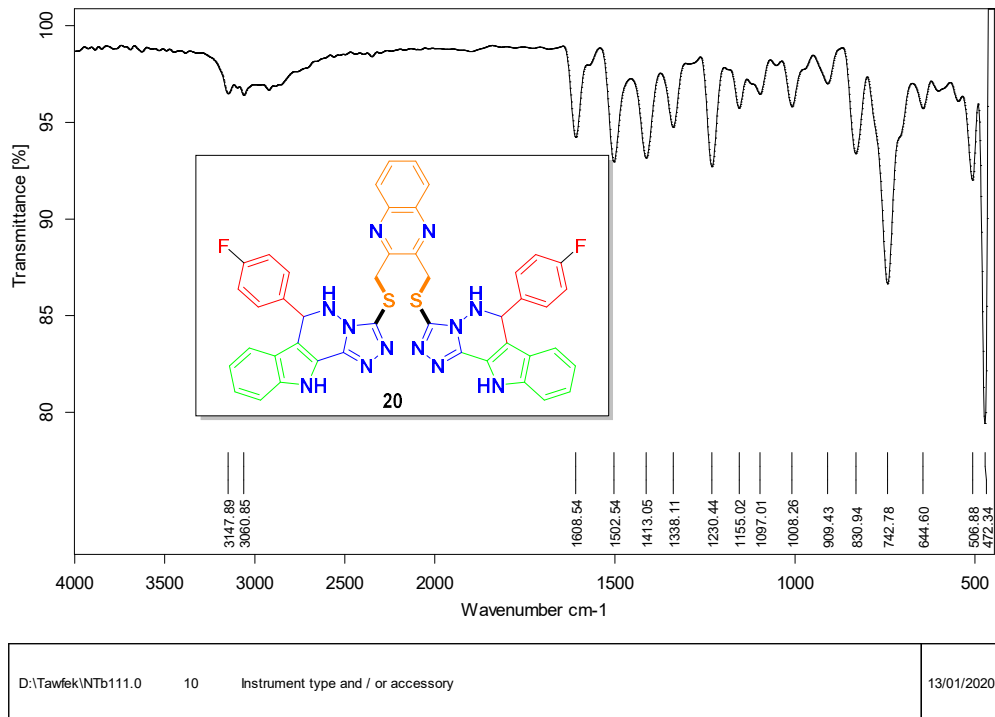

Page 1/1

Figure S57. IR of 20

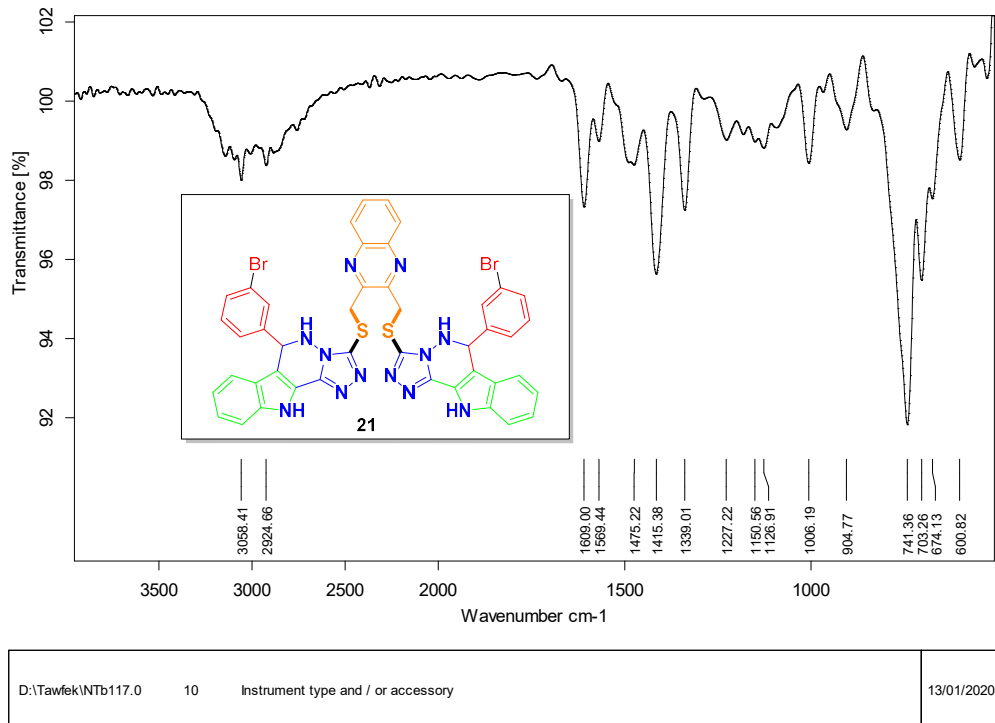

Page 1/1

Figure S58. IR of 21

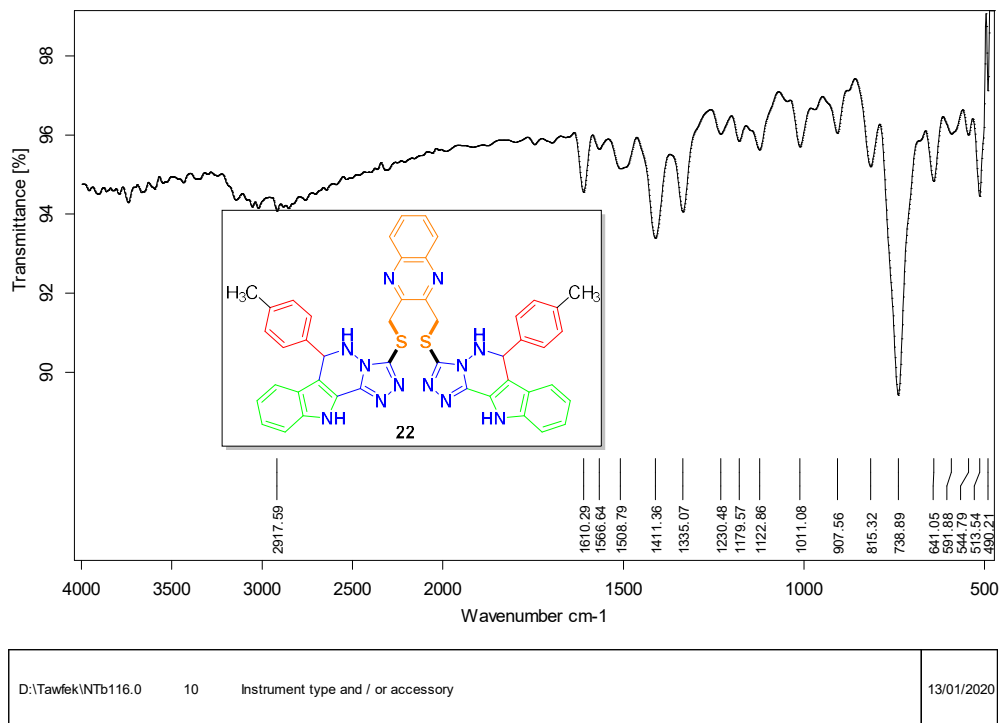

Page 1/1

Figure S59. IR of 22

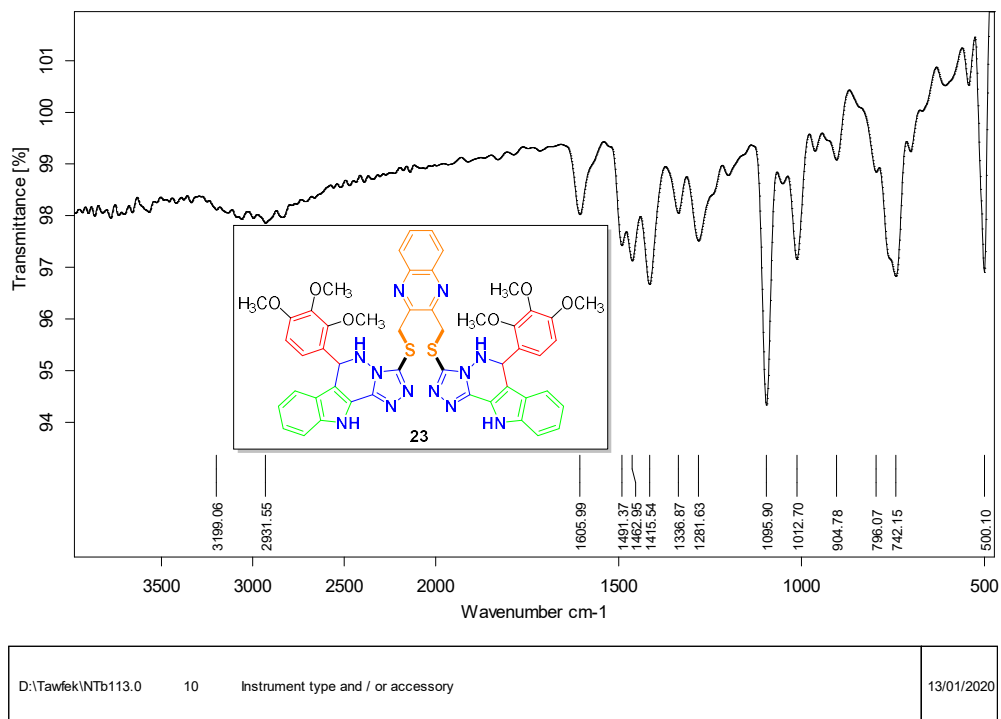

Page 1/1

Figure S60. IR of 23
